# Supplementary material for: Solution-processable phenothiazine and phenoxazine substituted fluorene cored nanotextured hole transporting materials for achieving high-efficiency OLEDs
Source: Royal Society of Chemistry journal article supplement (doi:10.1039/d1tc05237c), 2022-01-01
Supplement: d1tc05237c1.pdf [file d1tc05237c1.pdf]

## Supplementary Information

### **Solution-processable Phenothiazine and Phenoxazine Substituted Fluorene Cored Nanotextured Hole Transporting Materials for Achieving High-efficiency OLEDs**

Mangey Ram Nagar,<sup>a</sup> A. Choudhury,<sup>a</sup> Daiva Tavgeniene,<sup>b</sup> Raminta Beresneviute,<sup>b</sup> Dovydas Blazelevicius,<sup>b</sup> Vyngintas Jankauskas,<sup>c</sup> Krishan Kumar<sup>d</sup>, Subrata Banik,<sup>e</sup> Subrata Ghosh<sup>d</sup>, Saulius Grigalevicius,<sup>b,\*</sup> and Jwo-Huei Jou<sup>a,\*</sup>

<sup>a</sup>Department of Materials Science and Engineering, National Tsing Hua University, Hsinchu, 30013, Taiwan.

<sup>b</sup>Department of Polymer Chemistry and Technology, Kaunas University of Technology, Radvilenu plentas 19, LT50254, Kaunas, Lithuania

<sup>c</sup> Vilnius Univ, Inst Chem Phys, LT10257, Vilnius, Lithuania

<sup>d</sup> School of Basic Sciences, Indian Institute of Technology Mandi, India

<sup>e</sup> Department of Chemistry, School of Chemical and Biotechnology, SASTRA Deemed University, Thanjavur 613401, Tamil Nadu, India

\*E-mail addresses of corresponding authors:

[1] Prof. Jwo-Huei Jou: [jjou@mx.nthu.edu.tw](mailto:jjou@mx.nthu.edu.tw)

[2] Prof. Saulius Grigalevicius: [saulius.grigalevicius@ktu.lt](mailto:saulius.grigalevicius@ktu.lt)

#### **Content:**

**Figure S1** TD Spectrum of DNFPhe.

**Figure S2** TD Spectrum of DDPFPhe.

**Figure S3** TD Spectrum of DFPPFhe.

**Figure S4** TD Spectrum of DPFPh.

**Figure S5** TD Spectrum of DDPPFPh.

**Figure S6** TD Spectrum of DNFPhe.

**Figure S7** Normalized ultraviolet-visible (UV-vis) absorption and photoluminescence (PL) spectra of thin-films for DNFPhe, DDPFPhe, DFPPFhe, DPFPh, DDPPFPh, and DNFPhe.

**Figure S8** cyclic voltammetry measurement of newly synthesized HTMs.

**Figure S9** Atomic force microscopic images of newly synthesized HTMs thin-films prepared on PEDOT:PSS.

**Figure S10** 3D topographies of newly synthesized HTMs thin-films prepared on PEDOT:PSS.

**Figure S11** Double-logarithmic representation of transient photocurrents curves of the newly synthesized HTMs, (a) DNFPhe, (b) DDPFPhe, (c) DFPPFPhe, (d) DPFPh, (e) DDPPFPhe, and (f) DNFPhe, and inset show the TOF transient curves.

**Figure S12.** Energy-transfer route of (a) yellow phosphorescent and (b) green TADF OLED fabricated with newly synthesized HTMs.

**Figure S13** MS Spectrum of DNFPhe.

**Figure S14** MS Spectrum of DDPFPhe.

**Figure S15** MS Spectrum of DFPPFPhe.

**Figure S16** MS Spectrum of DPFPh.

**Figure S17** MS Spectrum of DNFPhe.

**Figure S18** MS Spectrum of DDPPFPhe.

**Figure S19**  $^1\text{H}$  NMR spectrum of DNFPhe.

**Figure S20**  $^1\text{H}$  NMR spectrum of DDPFPhe.

**Figure S21**  $^1\text{H}$  NMR spectrum of DFPPFPhe.

**Figure S22**  $^1\text{H}$  NMR spectrum of DPFPh.

**Figure S23**  $^1\text{H}$  NMR spectrum of DNFPhe.

**Figure S24**  $^1\text{H}$  NMR spectrum of DDPPFPhe.

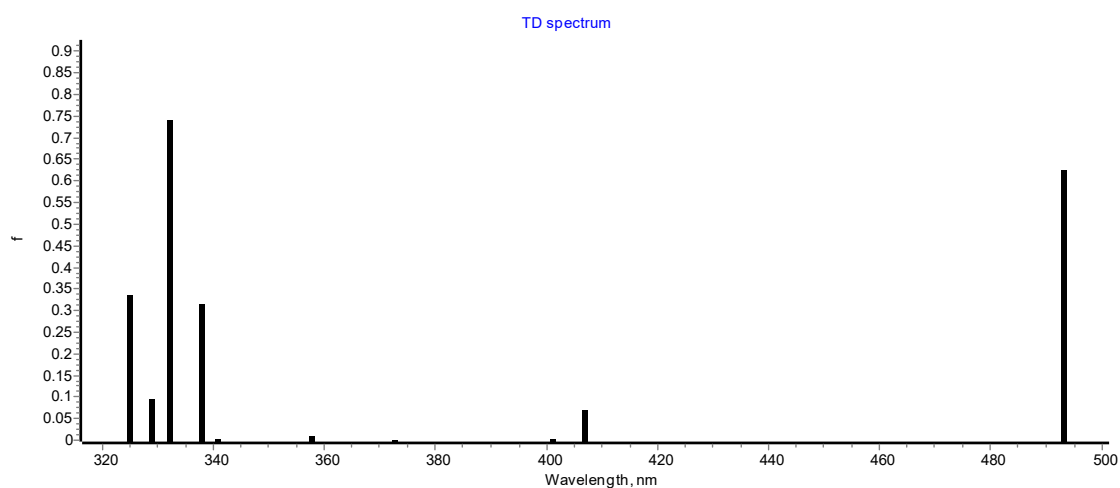

**Figure S1** TD Spectrum of DNFPhe.

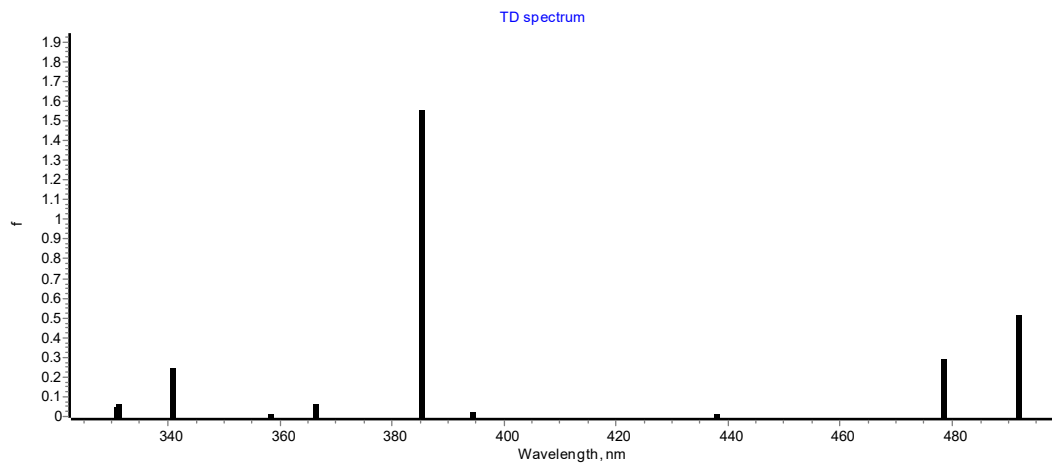

Figure S2 TD Spectrum of DDPFPhe.

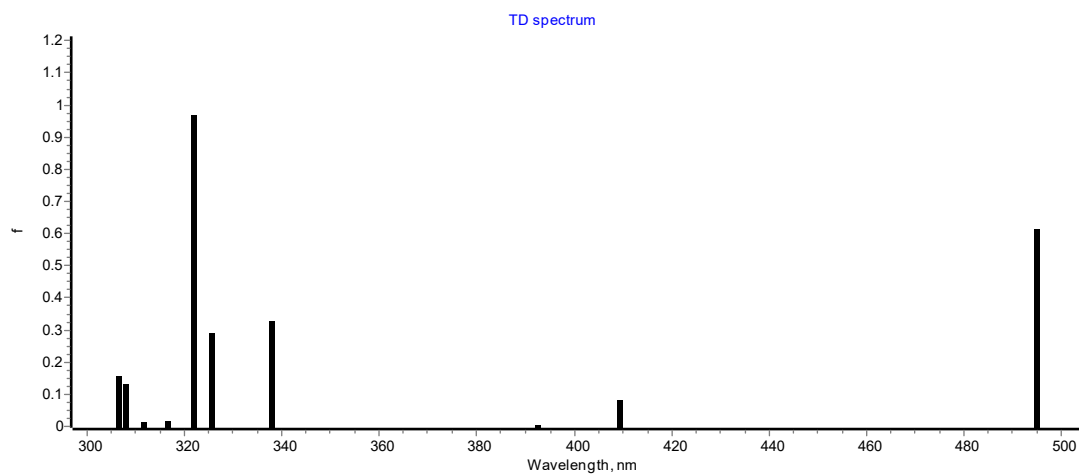

Figure S3 TD Spectrum of DFPFPhe.

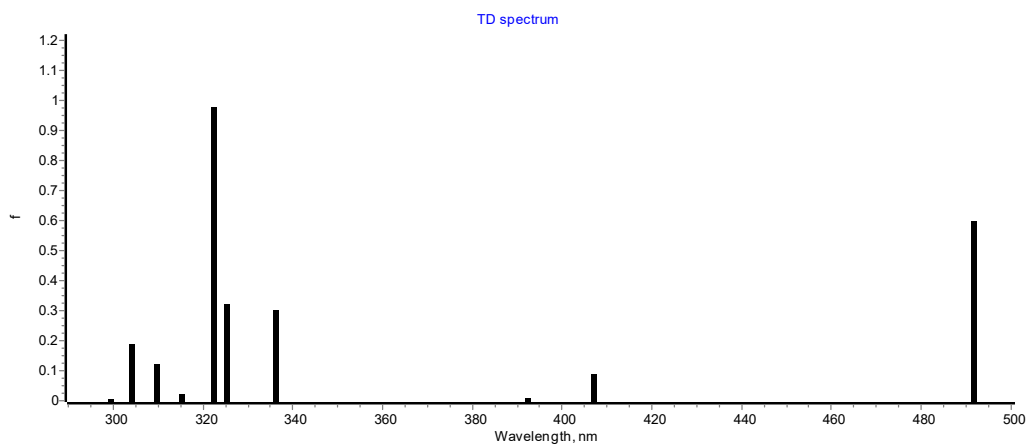

Figure S4 TD Spectrum of DPFPhе.

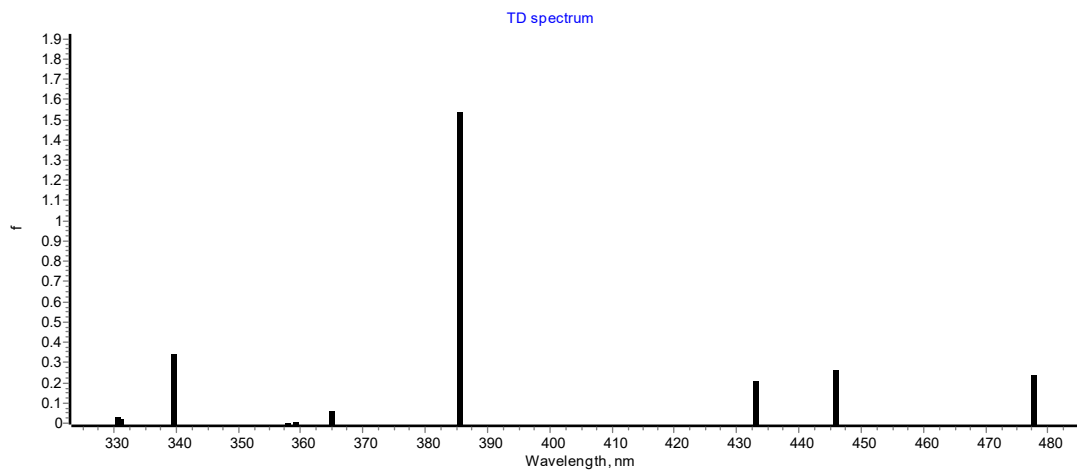

Figure S5 TD Spectrum of DDPPFPh.

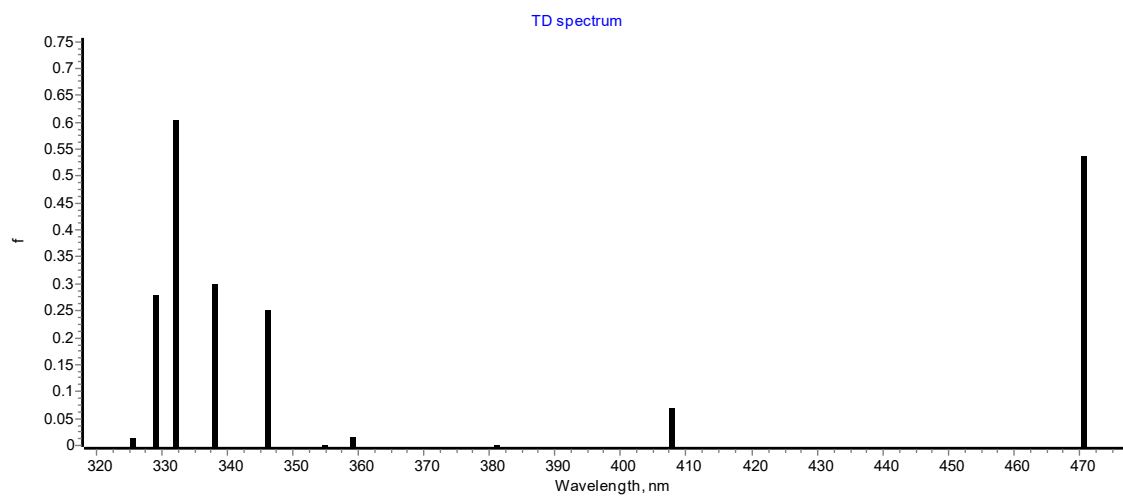

Figure S6 TD Spectrum of DNFPh.

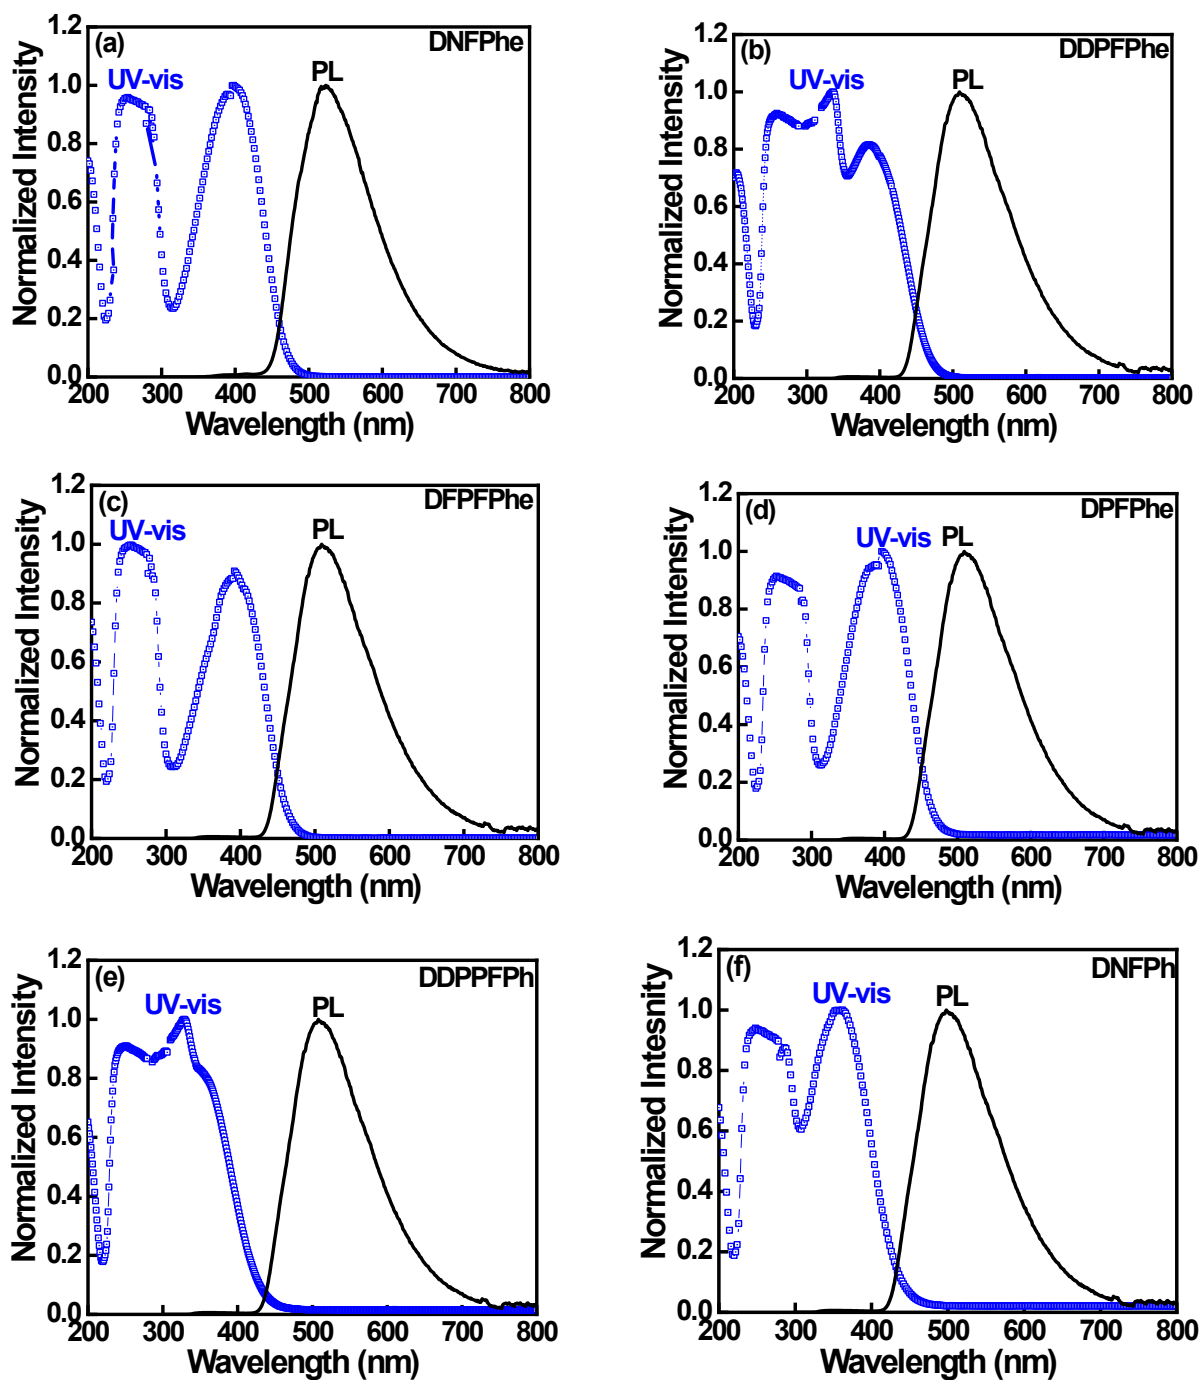

**Figure S7 (a-f).** Normalized ultraviolet-visible (UV-vis) absorption and photoluminescence (PL) spectra of thin-films for **DNFPh**, **DDPFPh**, **DFPFPh**, **DPFPh**, **DDPPFPh**, and **DNFPh**.

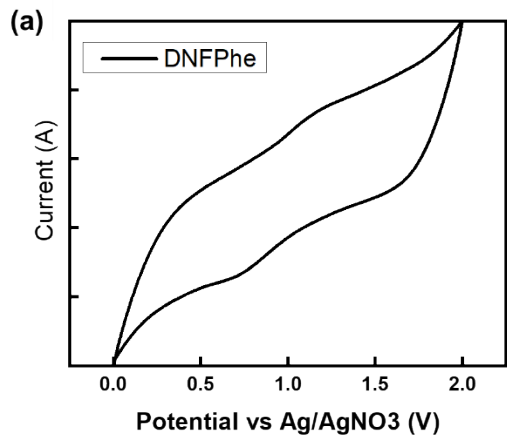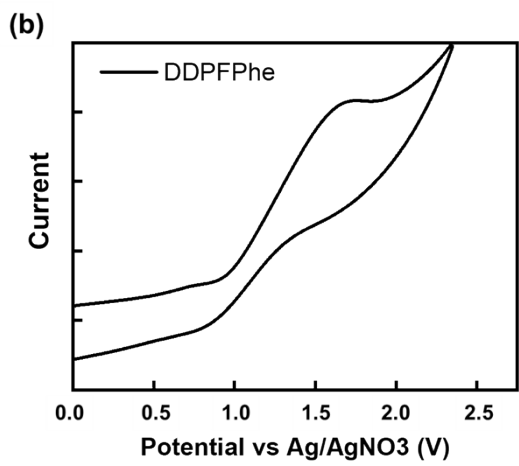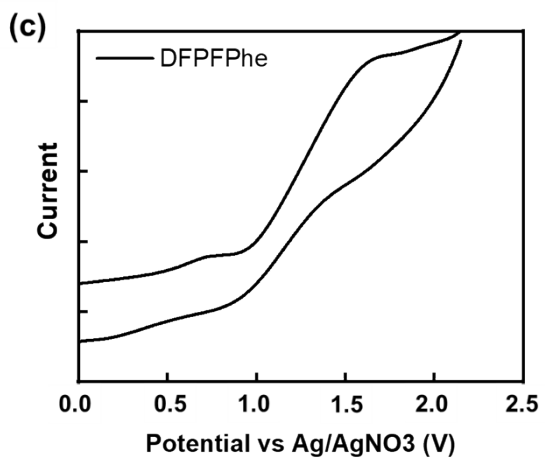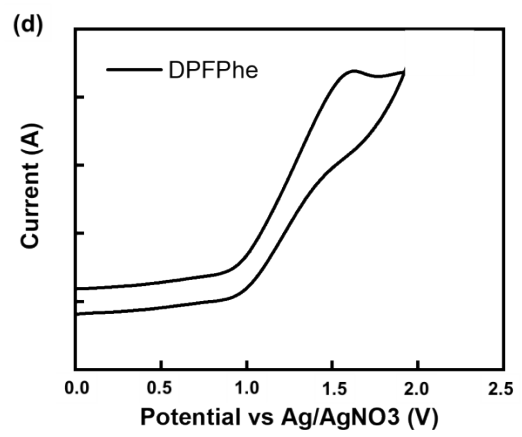

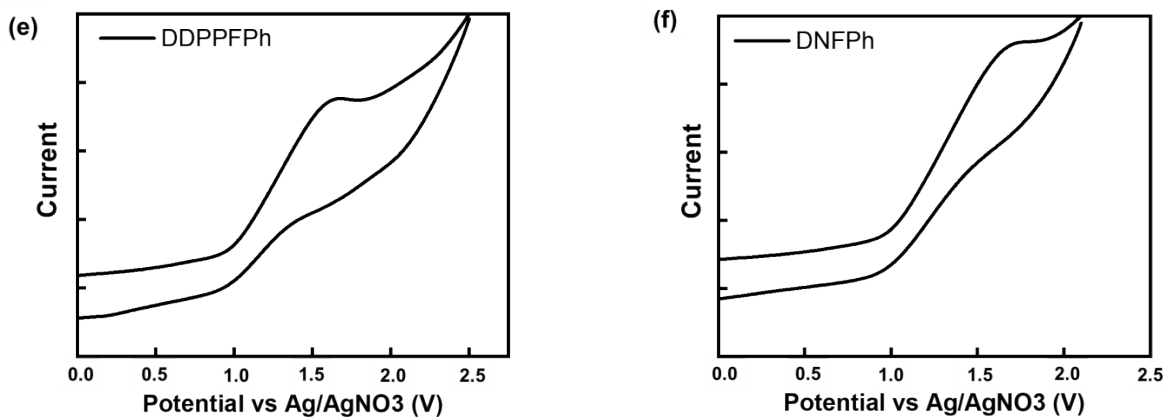

**Figure S8 (a-f)** cyclic voltammetry measurement of newly synthesized HTMs.

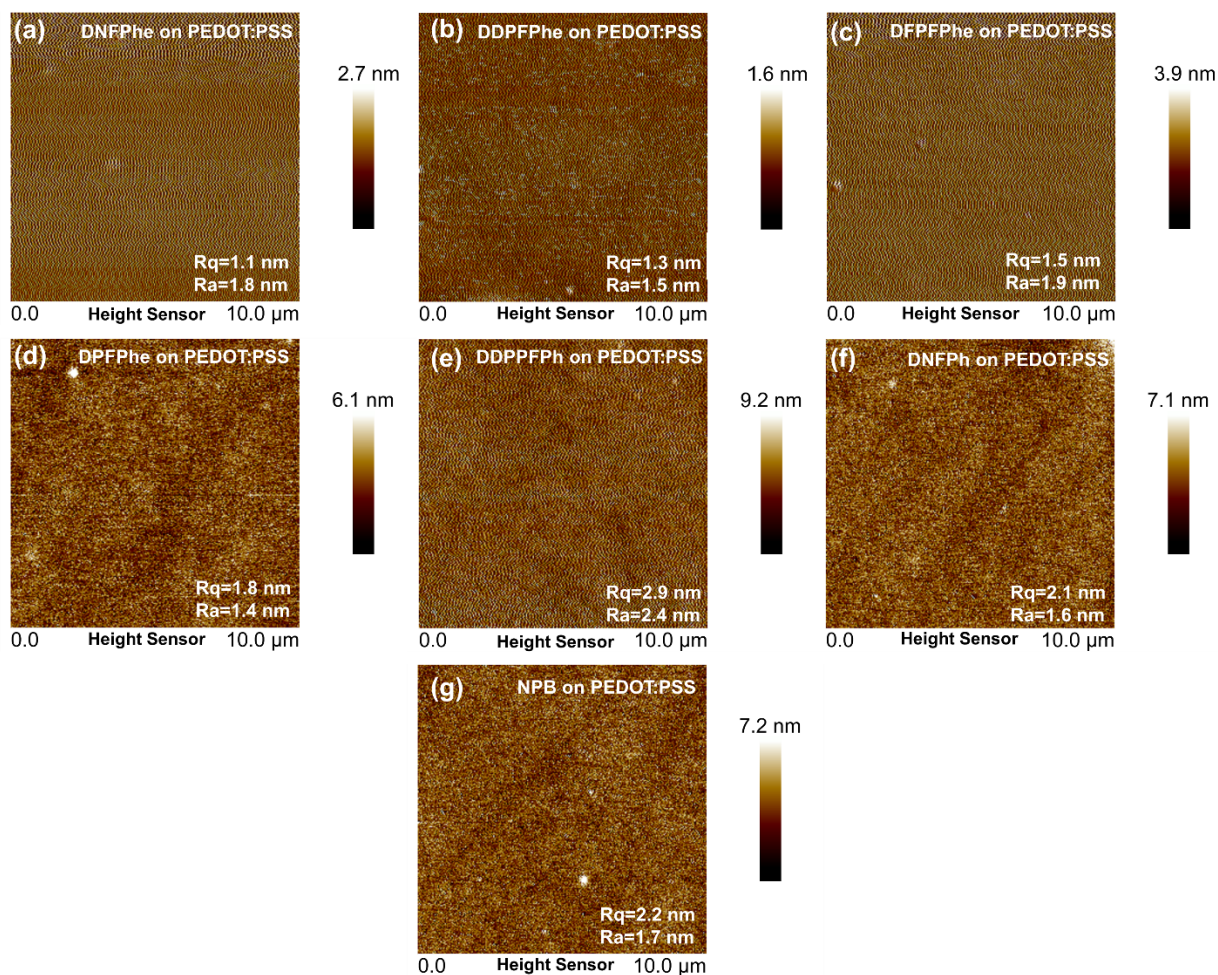

**Figure S9** Atomic force microscopic images of newly synthesized HTMs thin-films prepared on PEDOT:PSS.



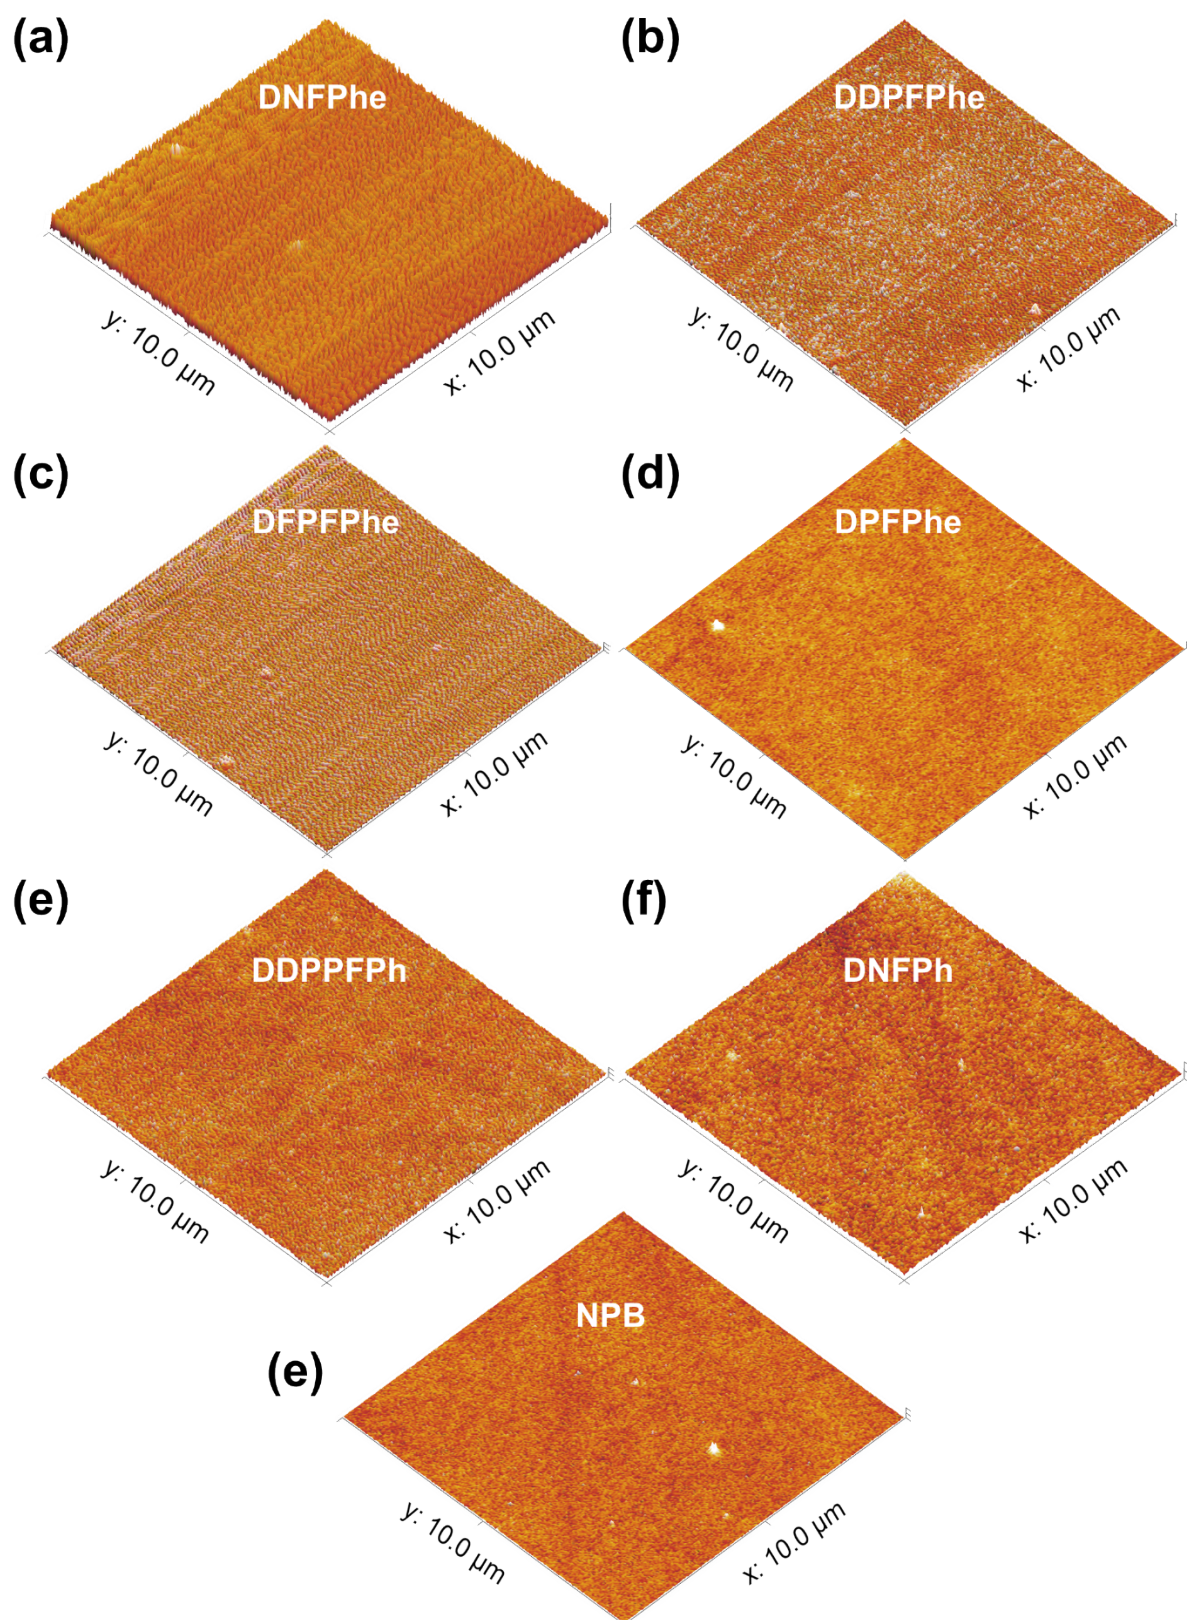

**Figure S10** 3D topographies of newly synthesized HTMs thin-films prepared on PEDOT:PSS.



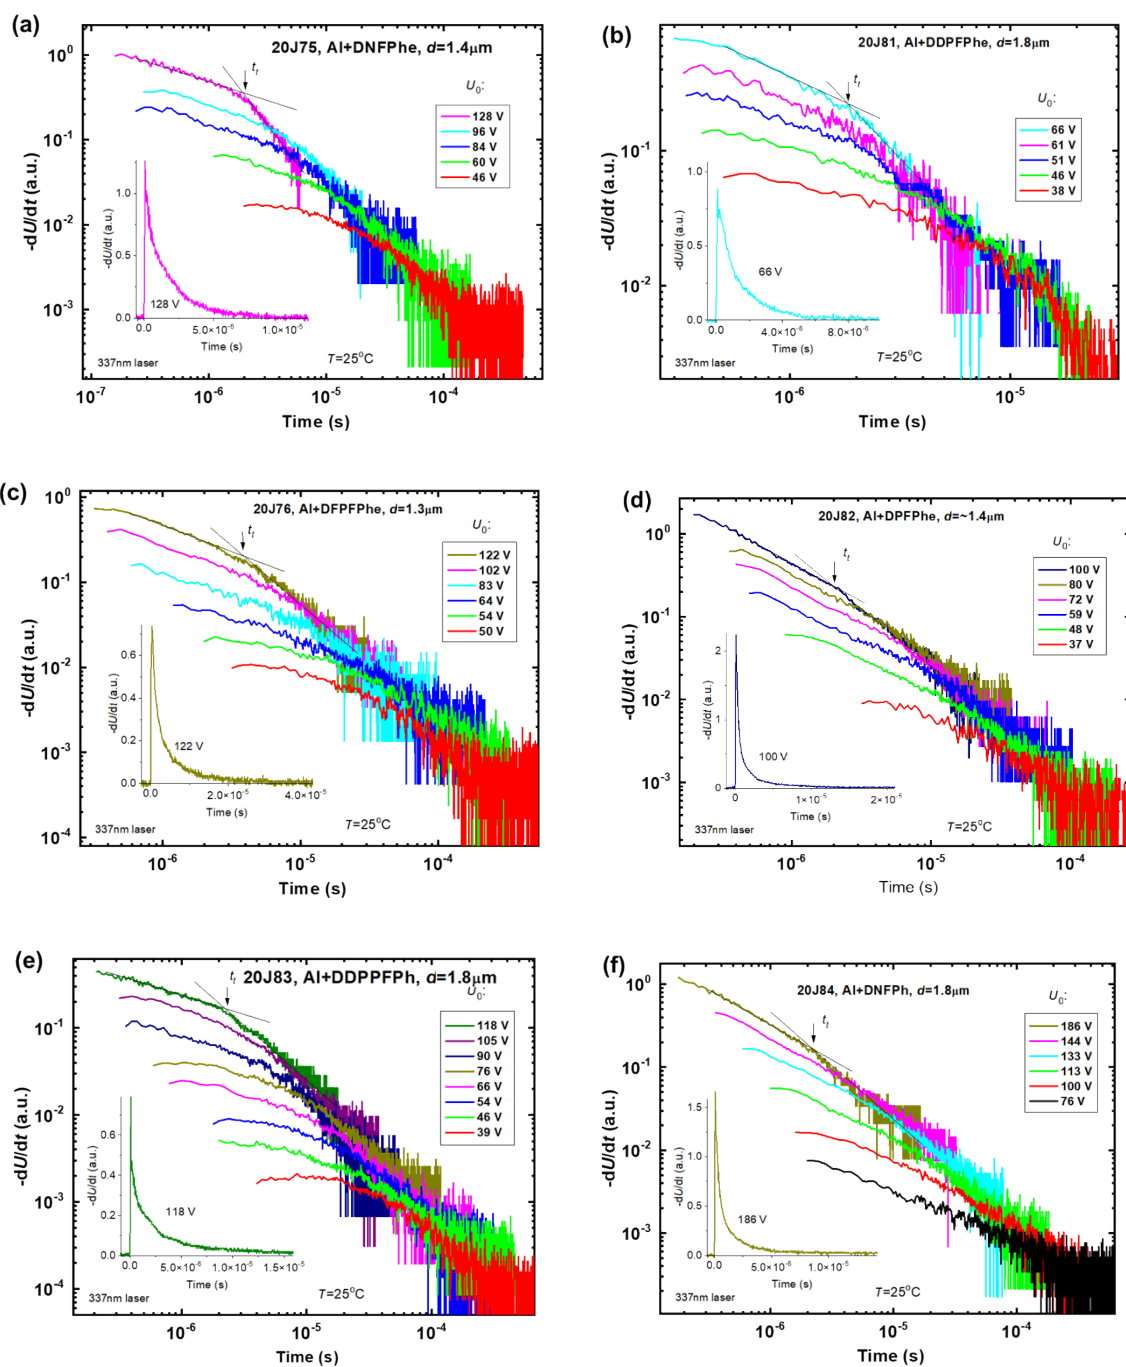

**Figure S11** Double-logarithmic representation of transient photocurrents curves of the newly synthesized HTMs, (a) DNFPhe, (b) DDPPFPh, (c) DFPFPh, (d) DPFPhe, (e) DDPPFPh, and (f) DNFPhe, and inset show the TOF transient curves.

**Table S1.** Reported characteristics of yellow phosphorescent and green TADF OLED in papers.

| HTLs                        | Operation Voltage (V)                                             | Power efficacy (lmW <sup>-1</sup> ) | Current efficacy (cdA <sup>-1</sup> ) | EQE (%)                       | CIE @100 cdm <sup>-2</sup> | L <sub>max</sub> (cdm <sup>-2</sup> ) | Ref.             |
|-----------------------------|-------------------------------------------------------------------|-------------------------------------|---------------------------------------|-------------------------------|----------------------------|---------------------------------------|------------------|
|                             | @ 100 cdm <sup>-2</sup> /1,000 cdm <sup>-2</sup> / maximum values |                                     |                                       |                               |                            |                                       |                  |
| FI-PyEyF                    | 4.9/6.1/-                                                         | 27.4/17.9/29.0                      | 46.6/34.7/49.4                        | 16.7/10.7/-                   | (0.53, 0.46)               | 10,913                                | 1                |
| di-FI-PyEyF                 | 4.7/6.1/-                                                         | 33.2/21.9/38.2                      | 53.4/39.0/58.7                        | 17.1/12.2/-                   | (0.53, 0.47)               | 12,060                                |                  |
| tri-FI-PyEyF                | 4.6/5.8/-                                                         | 35.3/25.6/39.5                      | 56.3/42.1/61.0                        | 17.4/12.4/-                   | (0.53, 0.47)               | 13,400                                |                  |
| Compound 3                  | 5.4/7.2/-                                                         | 14.8/8.5/23.1                       | 25.4/19.4/29.4                        | 7.7/5.9/9.0                   | (0.49,0.51)                | 12,120                                | 2                |
| Compound 4                  | 5.4/7.3/-                                                         | 14.0/8.6/22.8                       | 24.1/20/29.2                          | 7.4/6.1/9.0                   | (0.49,0.51)                | 16,700                                |                  |
| Compound 5                  | 5.5/7.5/-                                                         | 16.6/9.2/27.9                       | 29.3/22.0/35.7                        | 9.0/6.7/10.9                  | (0.49,0.51)                | 14,800                                |                  |
| Py-Br                       | -/-                                                               | -/11.7/12.3                         | -/22.4/27.6                           | -/7.4/9.0                     | (0.50, 0.49)               | 17 300                                | 3                |
| Py-MeO                      | -/-                                                               | -/10.3/11.8                         | -/19.2/25.7                           | -/6.9/8.8                     | (0.51, 0.49)               | 15 270                                |                  |
| PVK                         | -/-                                                               | -/14.2                              | -/31.6                                | -/16.8                        | (0.45,0.51)                | 3180                                  | 4                |
| PEDOT:PSS                   | 4.3/5.1/-                                                         | 4.3/5.1/-                           | 32.3/25.2/-                           | 44.0/40.9/-                   | (0.51, 0.49)               | 19870                                 | 5                |
| DDPPFPh                     | <b>3.7/ 4.4/ 6.4/ 3.5</b>                                         | <b>41.4/ 24.3/ 7.7/ 45.4</b>        | <b>48.2/ 33.8/ 15.6/ 50.6</b>         | <b>18.7/ 12.9/ 5.8/ 19.6</b>  | <b>(0.51, 0.48)</b>        | <b>19,409</b>                         | <b>This work</b> |
| PVK                         | 4.0/-                                                             | -/33.6                              | -/51.4                                | -/20.6                        | (0.24,0.50)                | 2816                                  | 6                |
| PVK                         | 3.8/-                                                             | -/17.2                              | -/25.8                                | -/11.2                        | (0.27,0.52)                | 951                                   |                  |
| PVK                         | -/-                                                               | -/8.9                               | -/-                                   | -/8.1                         | (0.20, 0.43)               | -                                     | 7                |
| PEDOT:PSS                   | -/-                                                               | -/17.6                              | -/43                                  | -/15                          | -                          | -                                     | 8                |
| PEDOT:PSS:PFI               | -/3.8                                                             | -/58                                | -/73                                  | -/24                          | -                          | -                                     |                  |
| PEDOT:PSS                   | 5.2/6.8/-                                                         | 22.0/16.6/32.6                      | 36.4/34.9/41.5                        | 12.3/11.7/13.9                | (0.23,0.54)                | -                                     | 9                |
| PEDOT:PSS:InCl <sub>3</sub> | -/-                                                               | -/-                                 | -/53.7                                | -/16.4                        | -                          | -                                     | 10               |
| PEDOT:PSS                   | -/-                                                               | -/-                                 | -/-                                   | -/18.6                        | -                          | -                                     | 11               |
| PVK:TFB                     | -/-                                                               | -/47.2                              | -/55.6                                | -/18.9                        | (0.35,0.56)                | -                                     | 12               |
| DDPPFPh                     | <b>4.2/ 5.5/ 7.0/ 3.6</b>                                         | <b>53.2/ 36.3/ 22.5/ 69.1</b>       | <b>71.6/ 64.0/ 50.0/ 78.0</b>         | <b>25.0/ 22.4/ 17.6/ 27.2</b> | <b>(0.29, 0.58)</b>        | <b>44278</b>                          | <b>This work</b> |

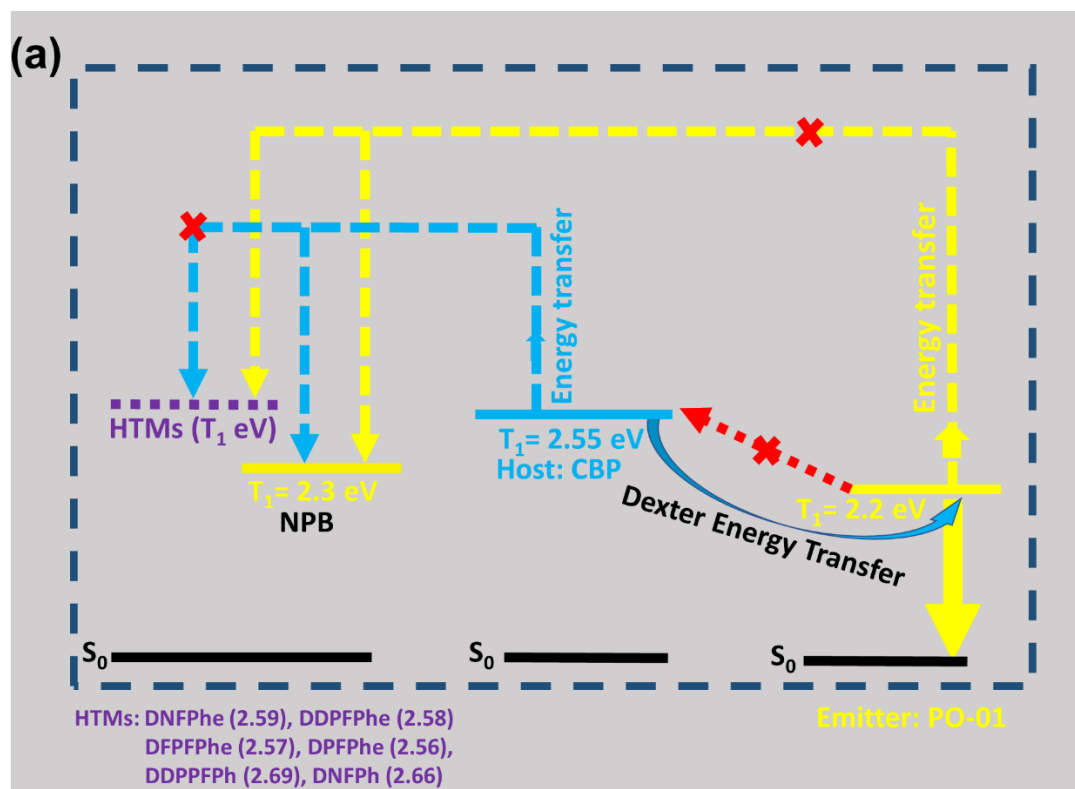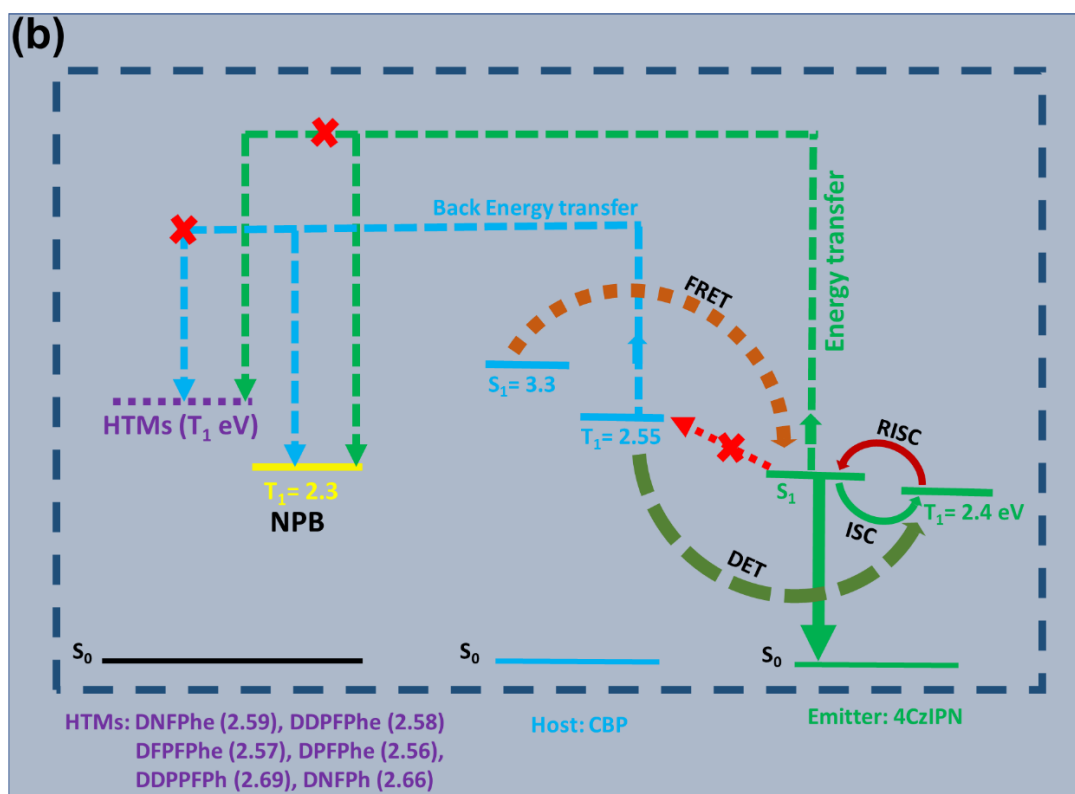

**Figure S12.** Energy-transfer route of (a) yellow phosphorescent and (b) green TADF OLED fabricated with newly synthesized HTMs. As observed, their high triplet energy indicates that they are more capable to confine excitons as comparing with NPB

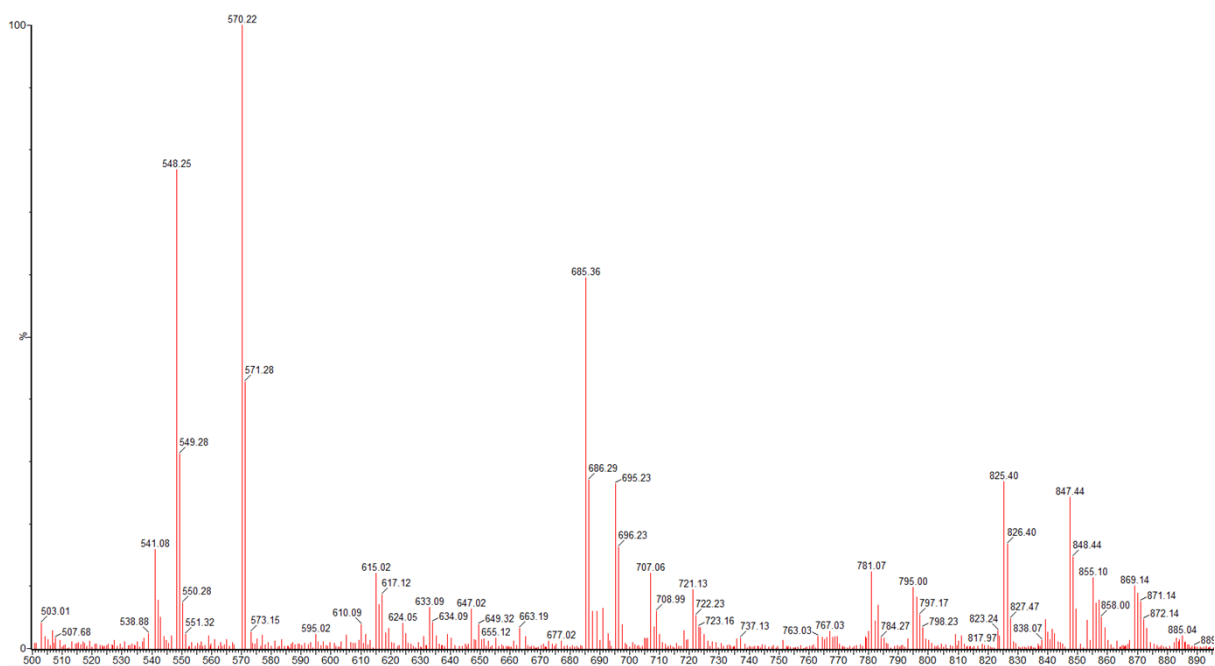

Figure S13 MS Spectrum of DNFPhE.

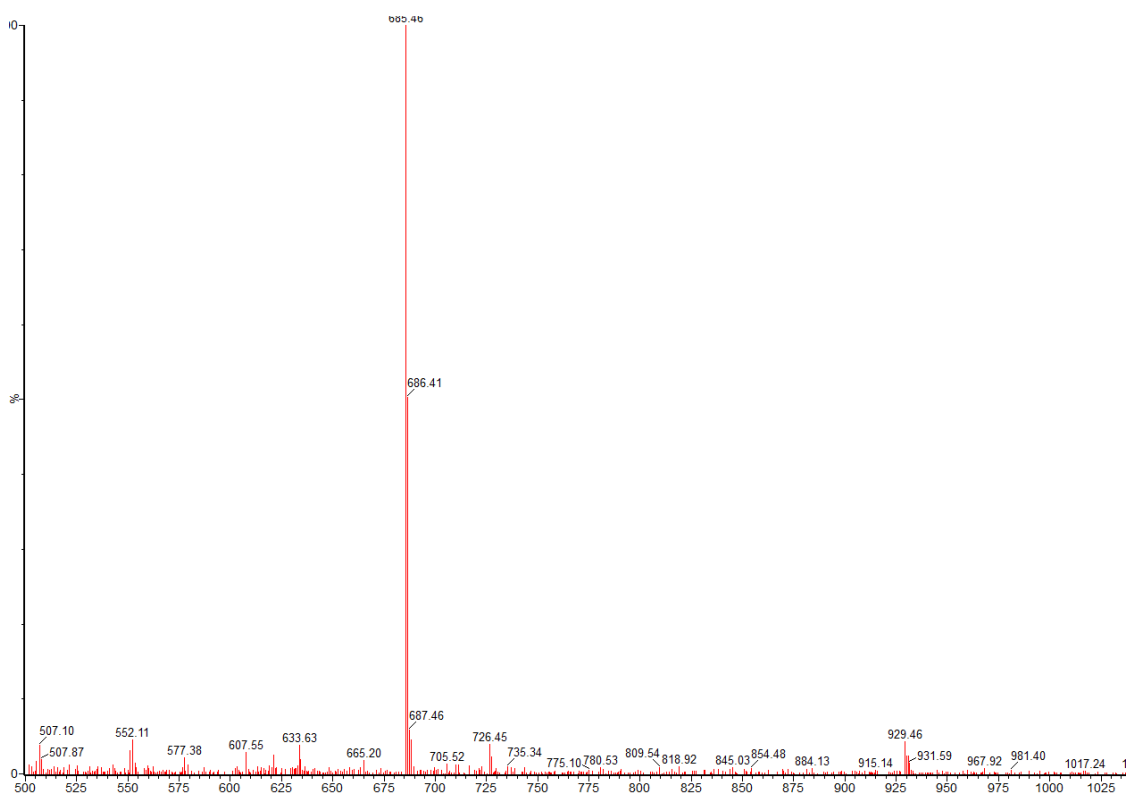

Figure S14 MS Spectrum of DDPFPhE.

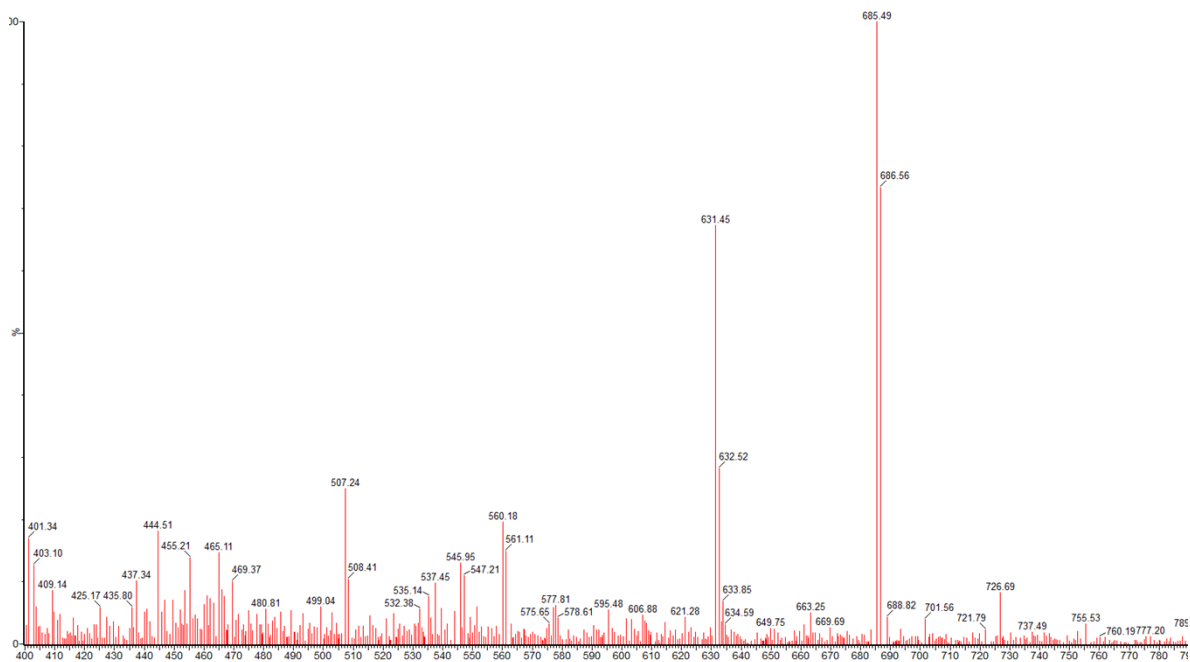

**Figure S15** MS Spectrum of DFPFPhe.

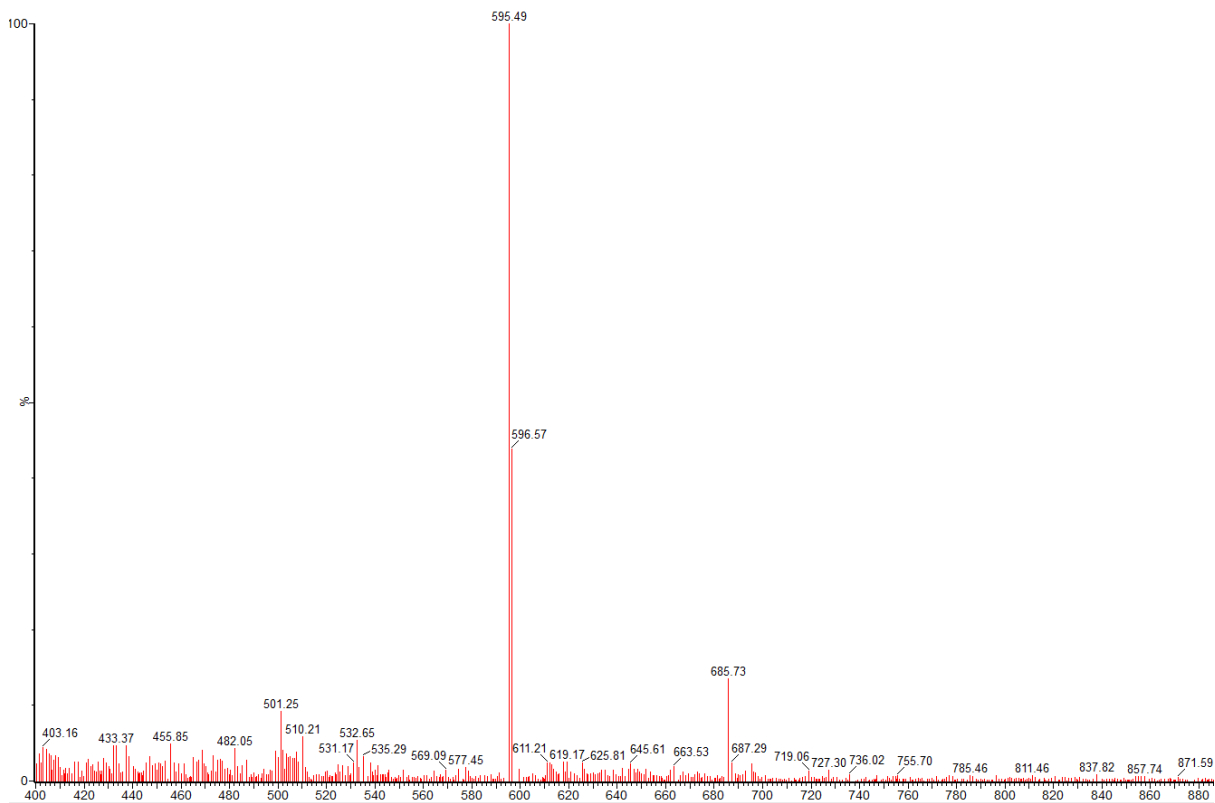

**Figure S16** MS Spectrum of DPFPhE.

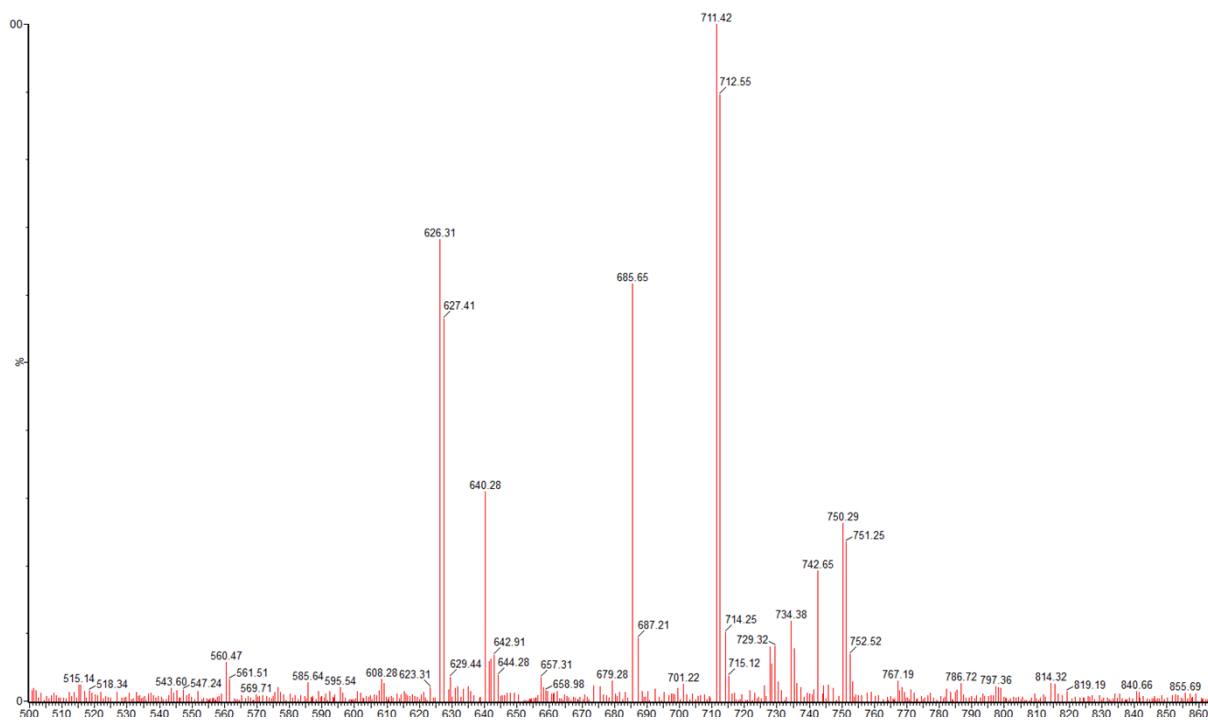

**Figure S17** MS Spectrum of DNFPh.

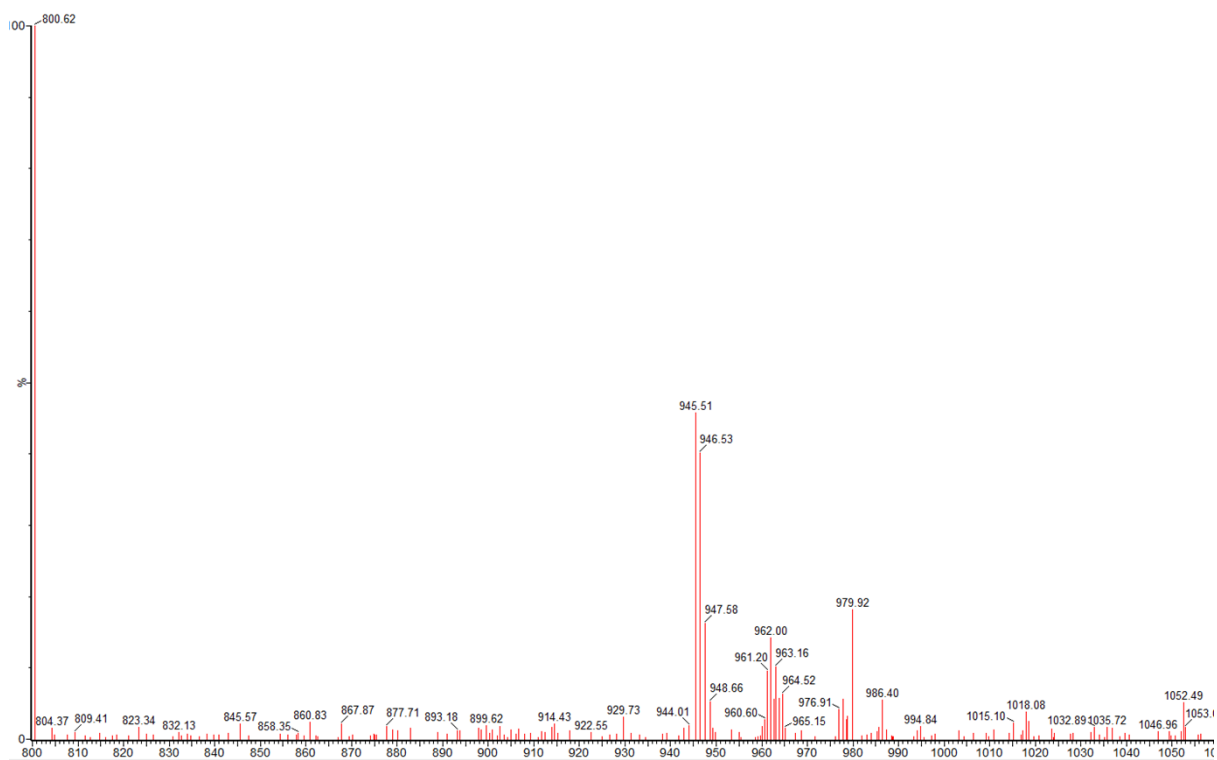

**Figure S18** MS Spectrum of DDPPFPh.



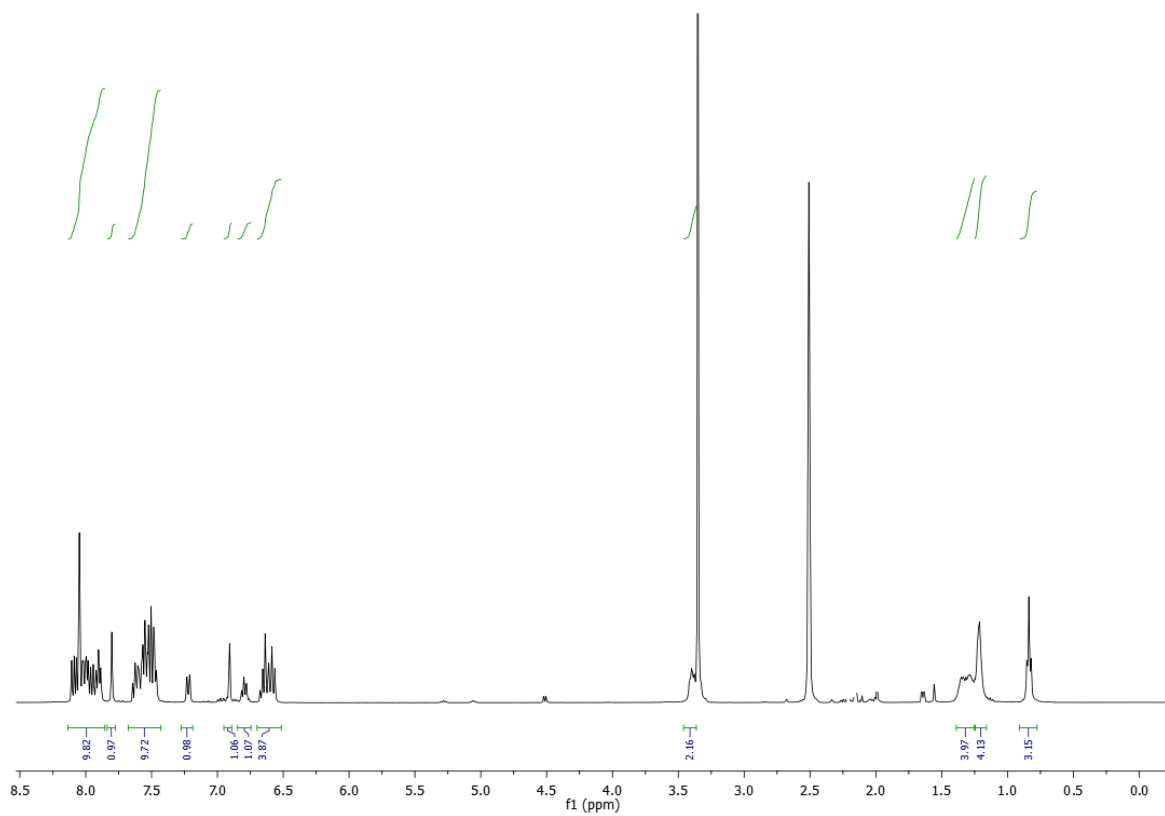

**Figure S19**  $^1\text{H}$  NMR spectrum of DNFPhe

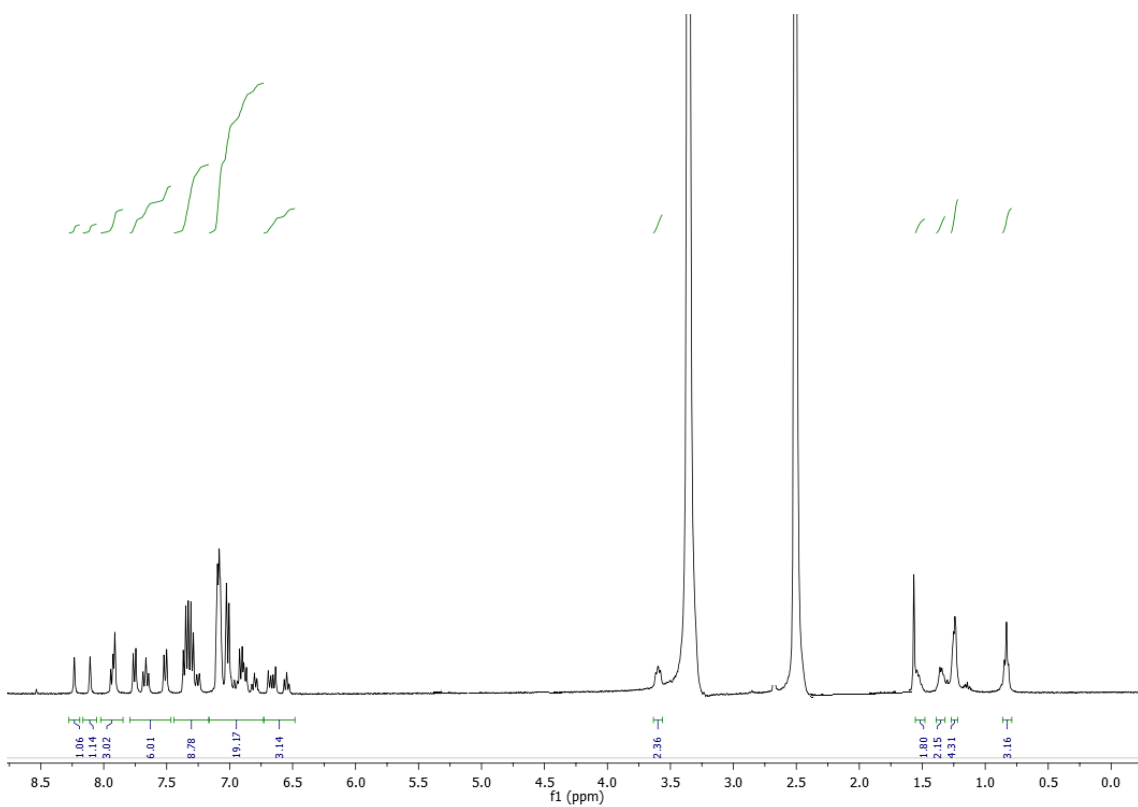

**Figure S20**  $^1\text{H}$  NMR spectrum of DDPFphe.

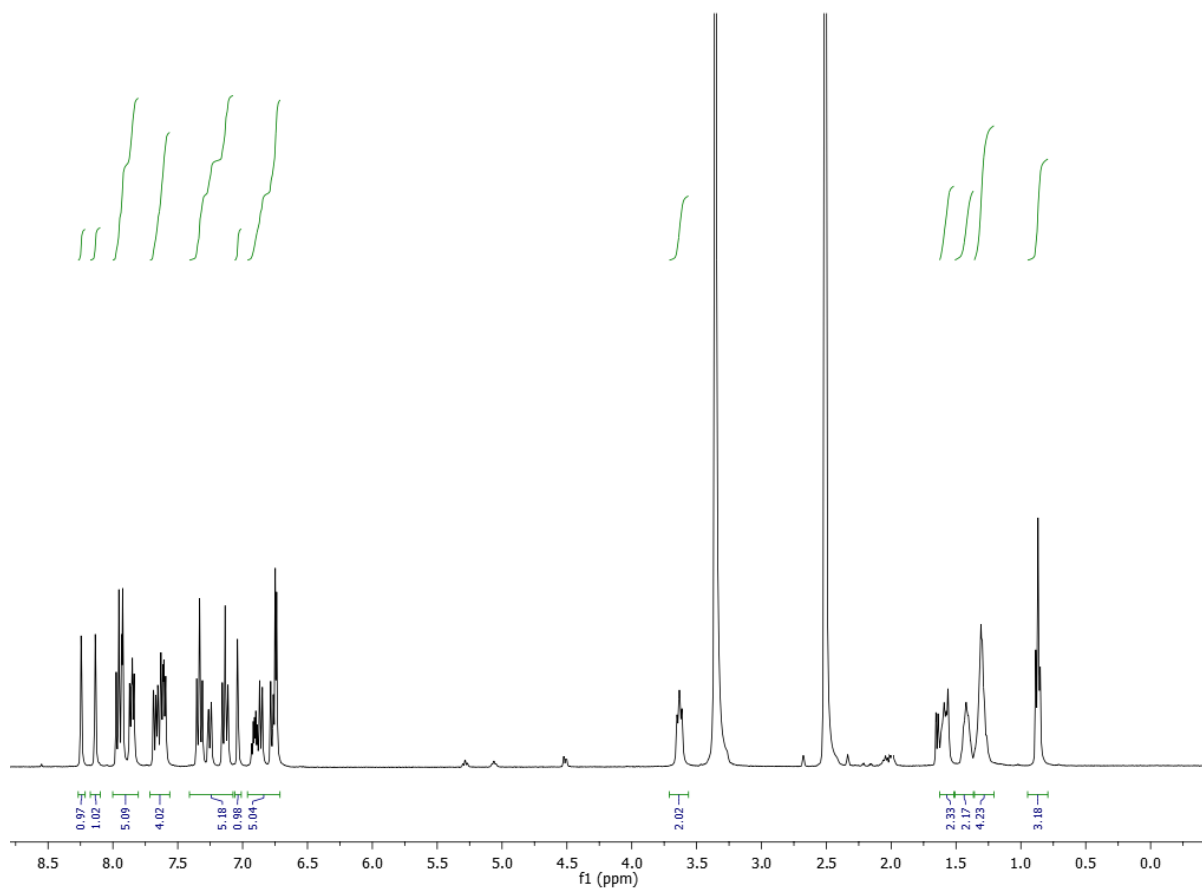

**Figure S21**  $^1\text{H}$  NMR spectrum of DFPFPh.

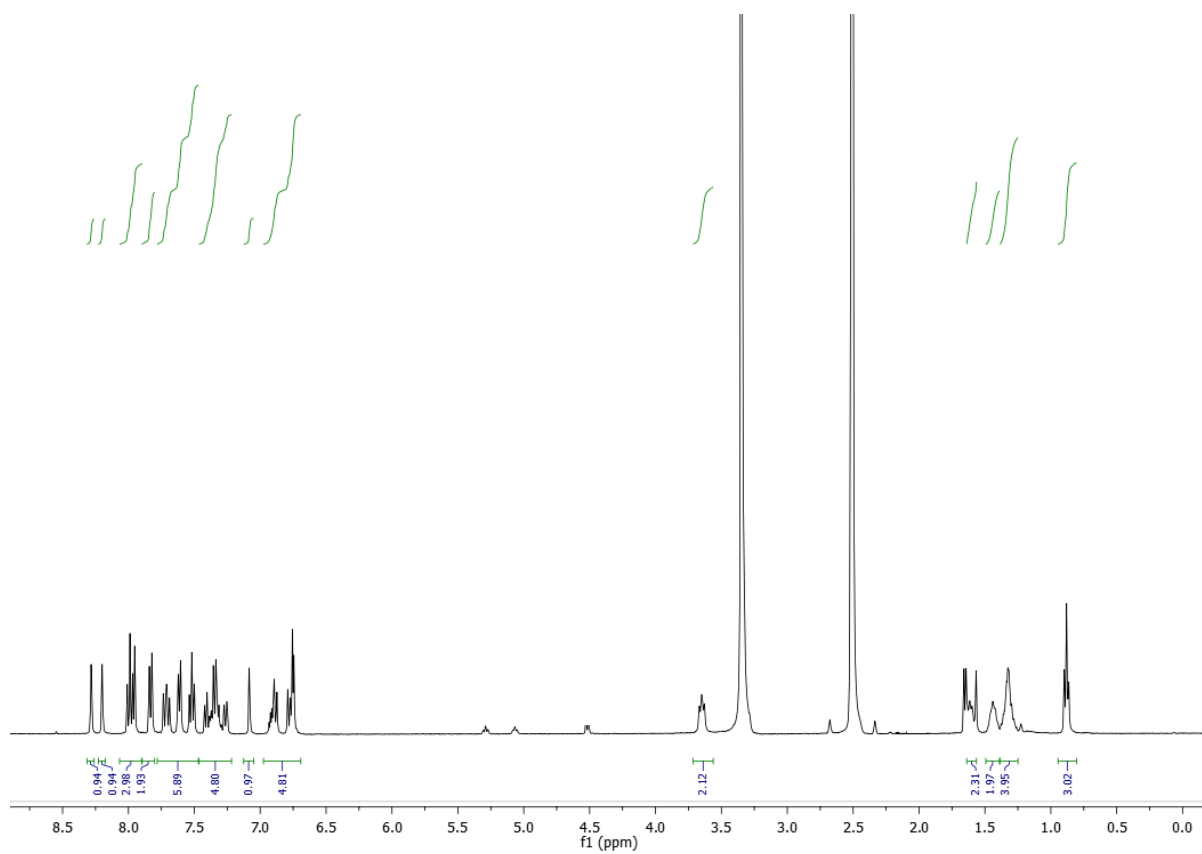

**Figure S22**  $^1\text{H}$  NMR spectrum of DPFPh.

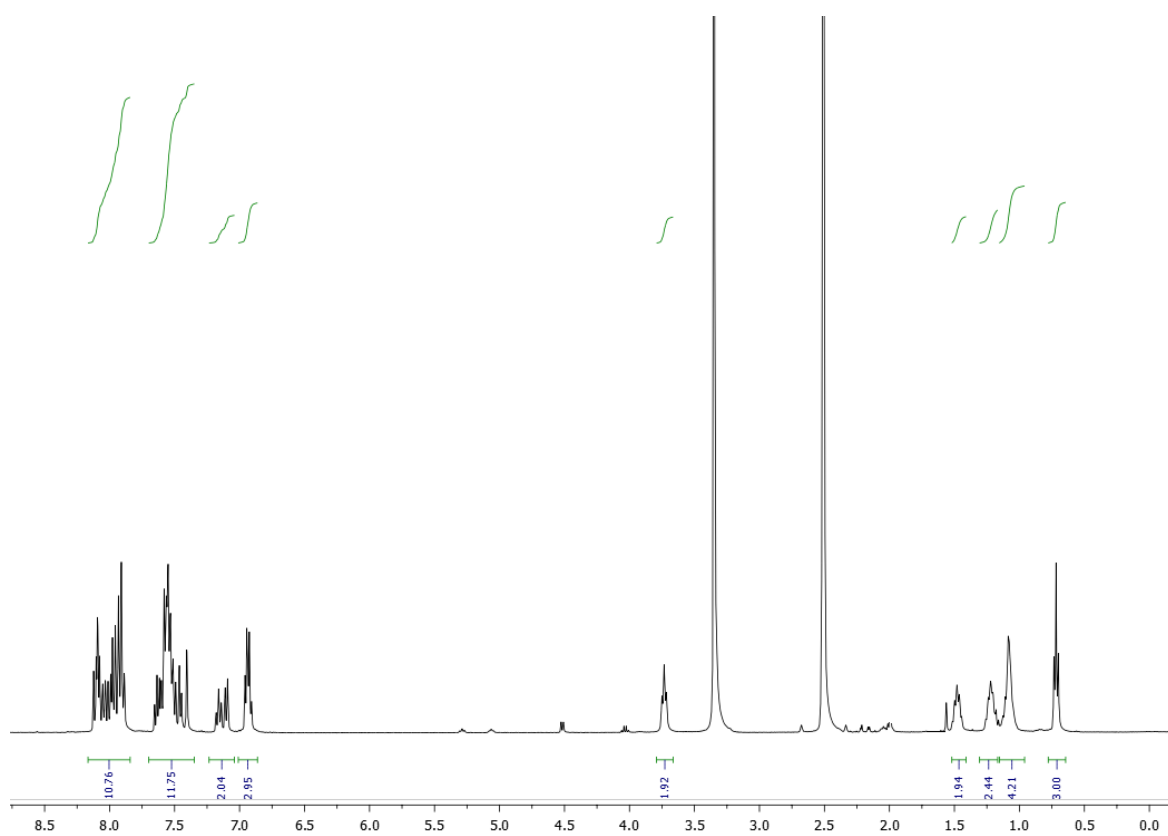

**Figure S23**  $^1\text{H}$  NMR spectrum of DNFPh.

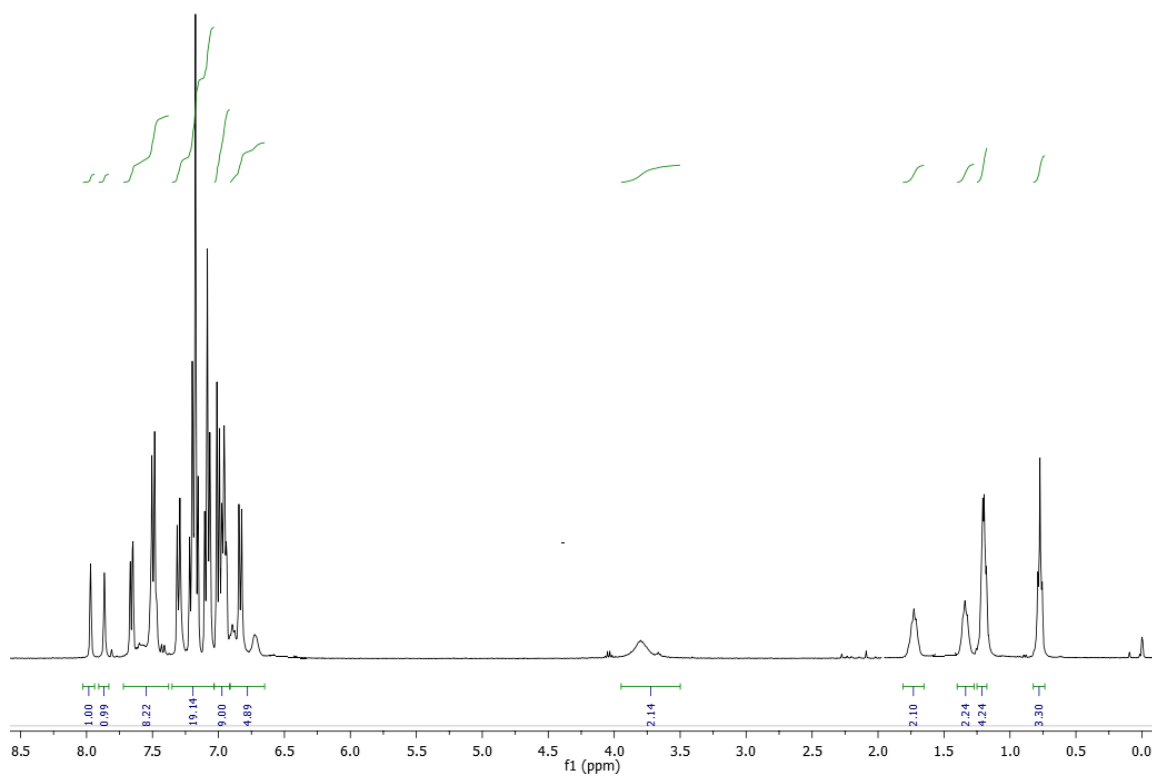

**Figure S24**  $^1\text{H}$  NMR spectrum of DDPPFPh.

Coordinates of the optimized structures:

1. Coordinates of the optimized structure of DNFPhе

|   |              |              |              |
|---|--------------|--------------|--------------|
| 6 | -4.795512000 | 6.237315000  | -1.582638000 |
| 6 | -3.683665000 | 6.635828000  | -2.312108000 |
| 6 | -2.463993000 | 5.987549000  | -2.104561000 |
| 6 | -2.367770000 | 4.970266000  | -1.170933000 |
| 6 | -3.479472000 | 4.553826000  | -0.416352000 |
| 6 | -4.697924000 | 5.201602000  | -0.649974000 |
| 8 | -1.122005000 | 4.400321000  | -0.989570000 |
| 7 | -3.316465000 | 3.525396000  | 0.529829000  |
| 6 | -4.421186000 | 3.150440000  | 1.414223000  |
| 6 | -5.378937000 | 2.104869000  | 0.823679000  |
| 6 | -6.508639000 | 1.736913000  | 1.792109000  |
| 6 | -7.478166000 | 0.697417000  | 1.218566000  |
| 6 | -8.609307000 | 0.317016000  | 2.180987000  |
| 6 | -9.576625000 | -0.716304000 | 1.596324000  |
| 6 | 6.797283000  | 0.979719000  | -1.382471000 |
| 6 | 7.230451000  | 1.870994000  | -2.335740000 |
| 6 | 8.392145000  | 2.646559000  | -2.118842000 |
| 6 | 9.107122000  | 2.497480000  | -0.956030000 |
| 6 | -1.773887000 | -5.058726000 | -2.094655000 |
| 6 | -2.315521000 | -5.817041000 | -3.105762000 |
| 6 | -3.702786000 | -6.086193000 | -3.137871000 |
| 6 | -4.522174000 | -5.572447000 | -2.163047000 |
| 6 | -1.049309000 | 3.226537000  | -0.266805000 |
| 6 | -2.136230000 | 2.781644000  | 0.514282000  |
| 6 | 0.142637000  | 2.535963000  | -0.310283000 |
| 6 | 0.324934000  | 1.339432000  | 0.415261000  |
| 6 | -0.740254000 | 0.911028000  | 1.215754000  |
| 6 | -1.943631000 | 1.608992000  | 1.258521000  |

|   |              |              |              |
|---|--------------|--------------|--------------|
| 6 | 1.629817000  | 0.686688000  | 0.370965000  |
| 6 | 1.997204000  | -0.617686000 | 0.453195000  |
| 6 | 3.417827000  | -1.033496000 | 0.555409000  |
| 6 | 3.488112000  | -2.441739000 | 0.630649000  |
| 6 | 2.128329000  | -2.969561000 | 0.532170000  |
| 6 | 1.222965000  | -1.883033000 | 0.423170000  |
| 6 | 4.581476000  | -0.272441000 | 0.619295000  |
| 6 | 5.827216000  | -0.905190000 | 0.749285000  |
| 6 | 5.876824000  | -2.308724000 | 0.827380000  |
| 6 | 4.718187000  | -3.079810000 | 0.768927000  |
| 6 | 1.669800000  | -4.283969000 | 0.493613000  |
| 6 | 0.310372000  | -4.526051000 | 0.321080000  |
| 6 | -0.601843000 | -3.466880000 | 0.171068000  |
| 6 | -0.133127000 | -2.145776000 | 0.223840000  |
| 6 | -2.061916000 | -3.730014000 | 0.018559000  |
| 6 | 7.082905000  | -0.108847000 | 0.864491000  |
| 6 | 7.497679000  | 0.813138000  | -0.155749000 |
| 6 | 8.693768000  | 1.579555000  | 0.046325000  |
| 6 | 9.450757000  | 1.397846000  | 1.232653000  |
| 6 | 9.051428000  | 0.488618000  | 2.179649000  |
| 6 | 7.869320000  | -0.259820000 | 1.991942000  |
| 6 | -2.585892000 | -4.528086000 | -1.054456000 |
| 6 | -3.997743000 | -4.778330000 | -1.108327000 |
| 6 | -4.847083000 | -4.219359000 | -0.118575000 |
| 6 | -4.327594000 | -3.435789000 | 0.881126000  |
| 6 | -2.937850000 | -3.195541000 | 0.945767000  |
| 1 | -5.753121000 | 6.721396000  | -1.733119000 |
| 1 | -3.753360000 | 7.436472000  | -3.038087000 |
| 1 | -1.571925000 | 6.266659000  | -2.652257000 |
| 1 | -5.583515000 | 4.902491000  | -0.107677000 |
| 1 | -3.992609000 | 2.786313000  | 2.350081000  |
| 1 | -4.964882000 | 4.060961000  | 1.673616000  |

|   |               |              |              |
|---|---------------|--------------|--------------|
| 1 | -5.802668000  | 2.488786000  | -0.110093000 |
| 1 | -4.812912000  | 1.205999000  | 0.557767000  |
| 1 | -6.077472000  | 1.353614000  | 2.725777000  |
| 1 | -7.067557000  | 2.641981000  | 2.062261000  |
| 1 | -7.911649000  | 1.083253000  | 0.287114000  |
| 1 | -6.918374000  | -0.205560000 | 0.943279000  |
| 1 | -8.176433000  | -0.072693000 | 3.110269000  |
| 1 | -9.165278000  | 1.220579000  | 2.458976000  |
| 1 | -10.369985000 | -0.966432000 | 2.306029000  |
| 1 | -10.051684000 | -0.340334000 | 0.684753000  |
| 1 | -9.055453000  | -1.643819000 | 1.339106000  |
| 1 | 5.913802000   | 0.383548000  | -1.569594000 |
| 1 | 6.680890000   | 1.976260000  | -3.264401000 |
| 1 | 8.720543000   | 3.349145000  | -2.876367000 |
| 1 | 10.008599000  | 3.077121000  | -0.787004000 |
| 1 | -0.711856000  | -4.851389000 | -2.092425000 |
| 1 | -1.675322000  | -6.207054000 | -3.889032000 |
| 1 | -4.116655000  | -6.689041000 | -3.938230000 |
| 1 | -5.590427000  | -5.760755000 | -2.187389000 |
| 1 | 0.941359000   | 2.939388000  | -0.921933000 |
| 1 | -0.626348000  | 0.037447000  | 1.843222000  |
| 1 | -2.736000000  | 1.231924000  | 1.888882000  |
| 1 | 2.451955000   | 1.389573000  | 0.252724000  |
| 1 | 4.540435000   | 0.810480000  | 0.589807000  |
| 1 | 6.840120000   | -2.796049000 | 0.925313000  |
| 1 | 4.783369000   | -4.160732000 | 0.828016000  |
| 1 | 2.359804000   | -5.114825000 | 0.591193000  |
| 1 | -0.053913000  | -5.546746000 | 0.308655000  |
| 1 | -0.840066000  | -1.339711000 | 0.087795000  |
| 1 | 10.351219000  | 1.986066000  | 1.373976000  |
| 1 | 9.632550000   | 0.347549000  | 3.083925000  |
| 1 | 7.555104000   | -0.952990000 | 2.764037000  |



|   |              |              |              |
|---|--------------|--------------|--------------|
| 1 | -5.912077000 | -4.419239000 | -0.168939000 |
| 1 | -4.977333000 | -3.008993000 | 1.636796000  |
| 1 | -2.542684000 | -2.599266000 | 1.760431000  |

2. Coordinates of the optimized structure of DDPFPhe-

|   |              |              |              |
|---|--------------|--------------|--------------|
| 6 | -1.038511000 | -1.139681000 | 0.007417000  |
| 6 | -3.630056000 | -1.460198000 | 0.016446000  |
| 6 | -4.686930000 | -2.383900000 | 0.082596000  |
| 6 | -4.380533000 | -3.755262000 | 0.189390000  |
| 6 | -3.064782000 | -4.207031000 | 0.224947000  |
| 6 | 0.206393000  | -4.598840000 | 0.169488000  |
| 6 | 1.036795000  | 3.314370000  | -0.686184000 |
| 6 | 2.133436000  | 3.157163000  | 0.172828000  |
| 6 | 0.037313000  | 2.349630000  | -0.762006000 |
| 6 | 0.090598000  | 1.173440000  | -0.002110000 |
| 6 | 1.169383000  | 1.035664000  | 0.893736000  |
| 6 | 2.157041000  | 1.995319000  | 0.971946000  |
| 6 | -1.004781000 | 0.212915000  | -0.099743000 |
| 6 | -2.311382000 | -1.901360000 | 0.045781000  |
| 6 | -2.026521000 | -3.280420000 | 0.151886000  |
| 6 | -0.575314000 | -3.446660000 | 0.146640000  |
| 6 | 0.031371000  | -2.166943000 | 0.053751000  |
| 6 | 1.589892000  | -4.486634000 | 0.077342000  |
| 6 | 2.215212000  | -3.232628000 | -0.053141000 |
| 6 | 1.416796000  | -2.075622000 | -0.064726000 |
| 6 | 3.689553000  | -3.129920000 | -0.176630000 |
| 6 | -6.096196000 | -1.923903000 | 0.045284000  |
| 6 | -6.489818000 | -0.721283000 | 0.654415000  |
| 6 | -7.808869000 | -0.288667000 | 0.626218000  |
| 6 | -8.793850000 | -1.040079000 | -0.030505000 |
| 6 | -8.412216000 | -2.239774000 | -0.648026000 |

|   |               |              |              |
|---|---------------|--------------|--------------|
| 6 | -7.093331000  | -2.671650000 | -0.601755000 |
| 6 | 4.544630000   | -4.005154000 | 0.512252000  |
| 6 | 5.925846000   | -3.902974000 | 0.411827000  |
| 6 | 6.513173000   | -2.922710000 | -0.400825000 |
| 6 | 5.669418000   | -2.050433000 | -1.103324000 |
| 6 | 4.289904000   | -2.150593000 | -0.984602000 |
| 7 | -10.141079000 | -0.598692000 | -0.068194000 |
| 6 | -10.433696000 | 0.777104000  | -0.277235000 |
| 6 | -11.201248000 | -1.530624000 | 0.103876000  |
| 6 | -12.342903000 | -1.468562000 | -0.707598000 |
| 6 | -13.381493000 | -2.377992000 | -0.530546000 |
| 6 | -13.295133000 | -3.372519000 | 0.443342000  |
| 6 | -12.157551000 | -3.441704000 | 1.247137000  |
| 6 | -11.121738000 | -2.525912000 | 1.088167000  |
| 6 | -9.733817000  | 1.515065000  | -1.242432000 |
| 6 | -10.017161000 | 2.863429000  | -1.438480000 |
| 6 | -11.011179000 | 3.495138000  | -0.691678000 |
| 6 | -11.715619000 | 2.761741000  | 0.262761000  |
| 6 | -11.427223000 | 1.417090000  | 0.477057000  |
| 8 | 3.187089000   | 1.757929000  | 1.859341000  |
| 6 | 4.071373000   | 2.786989000  | 2.119753000  |
| 6 | 4.088716000   | 3.955508000  | 1.336491000  |
| 7 | 3.174557000   | 4.080468000  | 0.275244000  |
| 7 | 7.922870000   | -2.814066000 | -0.508255000 |
| 6 | 8.725183000   | -3.986494000 | -0.575362000 |
| 6 | 8.540528000   | -1.533091000 | -0.526748000 |
| 6 | 9.593457000   | -1.264568000 | -1.412876000 |
| 6 | 10.204211000  | -0.014008000 | -1.420673000 |
| 6 | 9.767212000   | 0.994000000  | -0.561592000 |
| 6 | 8.713870000   | 0.733429000  | 0.314496000  |
| 6 | 8.109330000   | -0.519915000 | 0.341345000  |
| 6 | 8.346430000   | -5.063121000 | -1.389617000 |

|   |              |              |              |
|---|--------------|--------------|--------------|
| 6 | 9.131363000  | -6.210980000 | -1.447129000 |
| 6 | 10.312392000 | -6.300324000 | -0.710736000 |
| 6 | 10.696175000 | -5.227882000 | 0.093890000  |
| 6 | 9.908352000  | -4.083088000 | 0.170316000  |
| 6 | 4.957023000  | 2.602610000  | 3.167543000  |
| 6 | 5.904474000  | 3.584716000  | 3.466578000  |
| 6 | 5.935869000  | 4.748445000  | 2.709968000  |
| 6 | 5.032617000  | 4.936650000  | 1.660805000  |
| 6 | 3.256129000  | 5.213256000  | -0.647889000 |
| 6 | 2.477154000  | 6.460576000  | -0.204583000 |
| 6 | 2.597979000  | 7.605009000  | -1.216793000 |
| 6 | 1.813609000  | 8.857992000  | -0.811948000 |
| 6 | 1.930433000  | 10.005593000 | -1.821559000 |
| 6 | 1.137959000  | 11.251113000 | -1.414517000 |
| 1 | -3.855514000 | -0.404403000 | -0.080494000 |
| 1 | -5.188082000 | -4.473195000 | 0.271792000  |
| 1 | -2.860271000 | -5.268013000 | 0.317846000  |
| 1 | -0.252993000 | -5.578956000 | 0.235602000  |
| 1 | 0.949322000  | 4.201584000  | -1.296794000 |
| 1 | -0.797317000 | 2.513614000  | -1.434318000 |
| 1 | 1.239205000  | 0.186168000  | 1.559876000  |
| 1 | -1.965956000 | 0.685434000  | -0.291148000 |
| 1 | 2.193969000  | -5.386249000 | 0.068901000  |
| 1 | 1.897269000  | -1.112312000 | -0.154002000 |
| 1 | -5.759719000 | -0.129589000 | 1.194664000  |
| 1 | -8.083162000 | 0.632593000  | 1.125401000  |
| 1 | -9.152737000 | -2.829341000 | -1.174498000 |
| 1 | -6.827664000 | -3.590162000 | -1.112383000 |
| 1 | 4.125124000  | -4.756412000 | 1.171599000  |
| 1 | 6.556744000  | -4.578638000 | 0.976174000  |
| 1 | 6.099406000  | -1.296324000 | -1.750974000 |
| 1 | 3.667967000  | -1.475319000 | -1.560890000 |

|   |               |              |              |
|---|---------------|--------------|--------------|
| 1 | -12.411534000 | -0.706718000 | -1.474504000 |
| 1 | -14.256700000 | -2.315538000 | -1.167696000 |
| 1 | -14.102819000 | -4.083079000 | 0.574183000  |
| 1 | -12.079268000 | -4.204563000 | 2.013804000  |
| 1 | -10.247838000 | -2.577462000 | 1.726031000  |
| 1 | -8.969827000  | 1.028265000  | -1.836346000 |
| 1 | -9.466269000  | 3.418320000  | -2.189802000 |
| 1 | -11.233936000 | 4.543586000  | -0.851345000 |
| 1 | -12.486721000 | 3.240658000  | 0.855947000  |
| 1 | -11.970196000 | 0.857446000  | 1.228961000  |
| 1 | 9.929720000   | -2.038419000 | -2.092134000 |
| 1 | 11.017367000  | 0.175896000  | -2.112484000 |
| 1 | 10.240475000  | 1.968829000  | -0.575005000 |
| 1 | 8.366089000   | 1.504999000  | 0.992302000  |
| 1 | 7.299856000   | -0.717595000 | 1.033205000  |
| 1 | 7.437359000   | -4.995589000 | -1.974788000 |
| 1 | 8.823638000   | -7.033725000 | -2.082943000 |
| 1 | 10.924751000  | -7.192871000 | -0.763325000 |
| 1 | 11.607964000  | -5.285491000 | 0.677993000  |
| 1 | 10.206286000  | -3.259234000 | 0.807297000  |
| 1 | 4.897223000   | 1.680142000  | 3.732397000  |
| 1 | 6.599046000   | 3.434293000  | 4.283809000  |
| 1 | 6.657122000   | 5.526631000  | 2.929524000  |
| 1 | 5.071068000   | 5.858847000  | 1.098562000  |
| 1 | 4.311958000   | 5.455529000  | -0.785397000 |
| 1 | 2.900605000   | 4.872994000  | -1.623084000 |
| 1 | 1.422860000   | 6.199379000  | -0.065701000 |
| 1 | 2.843302000   | 6.790228000  | 0.773296000  |
| 1 | 3.656156000   | 7.866000000  | -1.345905000 |
| 1 | 2.246491000   | 7.260443000  | -2.197847000 |
| 1 | 0.755416000   | 8.596359000  | -0.684215000 |
| 1 | 2.163265000   | 9.203472000  | 0.169381000  |

|   |             |              |              |
|---|-------------|--------------|--------------|
| 1 | 2.987585000 | 10.269680000 | -1.945921000 |
| 1 | 1.585455000 | 9.658063000  | -2.802920000 |
| 1 | 1.242210000 | 12.049609000 | -2.154283000 |
| 1 | 0.071353000 | 11.025631000 | -1.316421000 |
| 1 | 1.483307000 | 11.641980000 | -0.452159000 |

### 3. Coordinates of the optimized structure of DFPPPh-

|   |              |              |              |
|---|--------------|--------------|--------------|
| 6 | -5.161107000 | 5.617407000  | -1.387854000 |
| 6 | -4.125063000 | 6.157790000  | -2.137430000 |
| 6 | -2.841823000 | 5.620355000  | -2.013763000 |
| 6 | -2.609587000 | 4.570831000  | -1.141888000 |
| 6 | -3.642742000 | 4.010528000  | -0.369281000 |
| 6 | -4.925680000 | 4.549371000  | -0.518453000 |
| 8 | -1.308749000 | 4.115562000  | -1.039078000 |
| 7 | -3.341940000 | 2.954624000  | 0.510768000  |
| 6 | -4.355939000 | 2.450230000  | 1.437623000  |
| 6 | -5.255484000 | 1.346313000  | 0.861706000  |
| 6 | -6.292675000 | 0.857342000  | 1.878433000  |
| 6 | -7.202694000 | -0.247439000 | 1.329707000  |
| 6 | -8.243539000 | -0.741767000 | 2.340636000  |
| 6 | -9.148929000 | -1.844012000 | 1.783198000  |
| 6 | -1.094719000 | 2.917412000  | -0.388481000 |
| 6 | -2.100716000 | 2.326933000  | 0.404545000  |
| 6 | 0.155686000  | 2.351329000  | -0.512893000 |
| 6 | 0.480311000  | 1.140357000  | 0.134210000  |
| 6 | -0.506988000 | 0.562384000  | 0.940364000  |
| 6 | -1.768869000 | 1.136706000  | 1.067925000  |
| 6 | 1.842409000  | 0.627416000  | 0.016883000  |
| 6 | 2.337402000  | -0.635963000 | -0.004415000 |
| 6 | 3.793177000  | -0.916758000 | 0.042268000  |
| 6 | 4.000584000  | -2.312766000 | 0.004866000  |

|   |              |              |              |
|---|--------------|--------------|--------------|
| 6 | 2.697310000  | -2.962368000 | -0.114601000 |
| 6 | 1.687905000  | -1.964908000 | -0.121474000 |
| 6 | 4.878207000  | -0.052605000 | 0.149773000  |
| 6 | 6.184196000  | -0.564913000 | 0.206132000  |
| 6 | 6.370073000  | -1.960224000 | 0.166252000  |
| 6 | 5.291217000  | -2.833933000 | 0.069048000  |
| 6 | 2.365705000  | -4.306965000 | -0.258651000 |
| 6 | 1.033036000  | -4.664404000 | -0.434667000 |
| 6 | 0.017976000  | -3.692050000 | -0.488230000 |
| 6 | 0.361077000  | -2.339315000 | -0.328835000 |
| 6 | -1.395860000 | -4.089098000 | -0.711981000 |
| 6 | 7.349551000  | 0.350058000  | 0.310403000  |
| 6 | 7.380533000  | 1.563998000  | -0.394227000 |
| 6 | 8.466301000  | 2.429444000  | -0.299499000 |
| 6 | 9.532564000  | 2.070868000  | 0.509823000  |
| 6 | 9.546677000  | 0.882223000  | 1.222282000  |
| 6 | 8.452406000  | 0.028743000  | 1.117605000  |
| 6 | -1.722483000 | -5.132011000 | -1.593466000 |
| 6 | -3.043827000 | -5.511152000 | -1.810277000 |
| 6 | -4.048012000 | -4.834842000 | -1.135955000 |
| 6 | -3.773423000 | -3.798863000 | -0.257388000 |
| 6 | -2.446528000 | -3.433688000 | -0.050502000 |
| 9 | 10.595057000 | 2.908690000  | 0.607528000  |
| 9 | -5.338849000 | -5.197724000 | -1.341747000 |
| 1 | -6.165579000 | 6.014499000  | -1.473456000 |
| 1 | -4.301927000 | 6.984152000  | -2.814739000 |
| 1 | -2.004812000 | 6.012013000  | -2.579145000 |
| 1 | -5.754435000 | 4.139686000  | 0.041134000  |
| 1 | -3.842578000 | 2.091245000  | 2.332088000  |
| 1 | -4.959620000 | 3.299409000  | 1.764129000  |
| 1 | -5.762481000 | 1.721300000  | -0.033378000 |
| 1 | -4.633569000 | 0.507016000  | 0.533347000  |



|   |              |              |              |
|---|--------------|--------------|--------------|
| 1 | -5.778225000 | 0.490016000  | 2.775632000  |
| 1 | -6.909086000 | 1.704461000  | 2.205158000  |
| 1 | -7.716795000 | 0.119825000  | 0.432433000  |
| 1 | -6.586467000 | -1.094793000 | 1.002629000  |
| 1 | -7.729294000 | -1.109526000 | 3.236791000  |
| 1 | -8.858366000 | 0.105402000  | 2.667799000  |
| 1 | -9.878482000 | -2.175433000 | 2.527226000  |
| 1 | -9.702994000 | -1.493590000 | 0.906693000  |
| 1 | -8.564917000 | -2.717775000 | 1.477329000  |
| 1 | 0.887331000  | 2.865589000  | -1.125300000 |
| 1 | -0.284837000 | -0.331817000 | 1.507567000  |
| 1 | -2.495128000 | 0.650343000  | 1.703647000  |
| 1 | 2.587536000  | 1.416513000  | -0.062345000 |
| 1 | 4.726775000  | 1.018675000  | 0.216321000  |
| 1 | 7.376297000  | -2.361859000 | 0.189678000  |
| 1 | 5.463394000  | -3.904052000 | 0.035323000  |
| 1 | 3.133366000  | -5.072583000 | -0.239850000 |
| 1 | 0.772240000  | -5.712614000 | -0.522552000 |
| 1 | -0.414786000 | -1.590361000 | -0.401717000 |
| 1 | 6.555641000  | 1.829009000  | -1.044692000 |
| 1 | 8.496076000  | 3.361934000  | -0.849344000 |
| 1 | 10.394041000 | 0.640925000  | 1.851986000  |
| 1 | 8.448443000  | -0.890204000 | 1.691375000  |
| 1 | -0.936112000 | -5.641863000 | -2.136725000 |
| 1 | -3.297835000 | -6.309208000 | -2.496811000 |
| 1 | -4.585043000 | -3.300101000 | 0.257652000  |
| 1 | -2.225758000 | -2.639762000 | 0.652528000  |

#### 4. Coordinates of the optimized structure of DPFPh-

|   |              |             |              |
|---|--------------|-------------|--------------|
| 6 | -5.600560000 | 4.925390000 | -1.465103000 |
| 6 | -4.629500000 | 5.576120000 | -2.214101000 |

|   |              |              |              |
|---|--------------|--------------|--------------|
| 6 | -3.292765000 | 5.194743000  | -2.077025000 |
| 6 | -2.945000000 | 4.188402000  | -1.192729000 |
| 6 | -3.911270000 | 3.518266000  | -0.421014000 |
| 6 | -5.247623000 | 3.900639000  | -0.583418000 |
| 8 | -1.600382000 | 3.891395000  | -1.074292000 |
| 7 | -3.494908000 | 2.513494000  | 0.470847000  |
| 6 | -4.439506000 | 1.930321000  | 1.424408000  |
| 6 | -5.229566000 | 0.722842000  | 0.897004000  |
| 6 | -6.209594000 | 0.180008000  | 1.942861000  |
| 6 | -7.011746000 | -1.031323000 | 1.454116000  |
| 6 | -8.003142000 | -1.566577000 | 2.493609000  |
| 6 | -8.799446000 | -2.778506000 | 2.001332000  |
| 6 | -1.253671000 | 2.727679000  | -0.417875000 |
| 6 | -2.190406000 | 2.028678000  | 0.371314000  |
| 6 | 0.054781000  | 2.308508000  | -0.531243000 |
| 6 | 0.509078000  | 1.143535000  | 0.120907000  |
| 6 | -0.412078000 | 0.455391000  | 0.918495000  |
| 6 | -1.731375000 | 0.884101000  | 1.038050000  |
| 6 | 1.922399000  | 0.784565000  | 0.024032000  |
| 6 | 2.541109000  | -0.421581000 | -0.018244000 |
| 6 | 4.014880000  | -0.565801000 | 0.068053000  |
| 6 | 4.354157000  | -1.934396000 | -0.005544000 |
| 6 | 3.122284000  | -2.698981000 | -0.189498000 |
| 6 | 2.024079000  | -1.800752000 | -0.198345000 |
| 6 | 5.008487000  | 0.392857000  | 0.238650000  |
| 6 | 6.355245000  | 0.004828000  | 0.324396000  |
| 6 | 6.673092000  | -1.365021000 | 0.247594000  |
| 6 | 5.686183000  | -2.332890000 | 0.085804000  |
| 6 | 2.922339000  | -4.062421000 | -0.390141000 |
| 6 | 1.635115000  | -4.533740000 | -0.627077000 |
| 6 | 0.535211000  | -3.658502000 | -0.684222000 |
| 6 | 0.745124000  | -2.287106000 | -0.464346000 |

|   |              |              |              |
|---|--------------|--------------|--------------|
| 6 | -0.826579000 | -4.175280000 | -0.977799000 |
| 6 | 7.425537000  | 1.020575000  | 0.497067000  |
| 6 | 7.359790000  | 2.259187000  | -0.160902000 |
| 6 | 8.362719000  | 3.211314000  | 0.001279000  |
| 6 | 9.456159000  | 2.947302000  | 0.824822000  |
| 6 | 9.536157000  | 1.721865000  | 1.484941000  |
| 6 | 8.532716000  | 0.770307000  | 1.323408000  |
| 6 | -1.021383000 | -5.203425000 | -1.914079000 |
| 6 | -2.296730000 | -5.687162000 | -2.193244000 |
| 6 | -3.408966000 | -5.153957000 | -1.543521000 |
| 6 | -3.232400000 | -4.132141000 | -0.611640000 |
| 6 | -1.956711000 | -3.649434000 | -0.331768000 |
| 1 | -6.643952000 | 5.201336000  | -1.560868000 |
| 1 | -4.897152000 | 6.369480000  | -2.901026000 |
| 1 | -2.503625000 | 5.677564000  | -2.640777000 |
| 1 | -6.025954000 | 3.400724000  | -0.024459000 |
| 1 | -3.880535000 | 1.652459000  | 2.320747000  |
| 1 | -5.125023000 | 2.721493000  | 1.735407000  |
| 1 | -5.775438000 | 1.011884000  | -0.007080000 |
| 1 | -4.532660000 | -0.066265000 | 0.596117000  |
| 1 | -5.657840000 | -0.094924000 | 2.850936000  |
| 1 | -6.903250000 | 0.977935000  | 2.237033000  |
| 1 | -7.556881000 | -0.760134000 | 0.541007000  |
| 1 | -6.319099000 | -1.833756000 | 1.169480000  |
| 1 | -7.458119000 | -1.834451000 | 3.406859000  |
| 1 | -8.695843000 | -0.764613000 | 2.775844000  |
| 1 | -9.497436000 | -3.133755000 | 2.764419000  |
| 1 | -9.380972000 | -2.532312000 | 1.107274000  |
| 1 | -8.135349000 | -3.610123000 | 1.745346000  |
| 1 | 0.728435000  | 2.901878000  | -1.138621000 |
| 1 | -0.094536000 | -0.412068000 | 1.482198000  |
| 1 | -2.403132000 | 0.319880000  | 1.669093000  |

|   |              |              |              |
|---|--------------|--------------|--------------|
| 1 | 2.583500000  | 1.648259000  | -0.011049000 |
| 1 | 4.753307000  | 1.442338000  | 0.331679000  |
| 1 | 7.711602000  | -1.671141000 | 0.294576000  |
| 1 | 5.961601000  | -3.379971000 | 0.024532000  |
| 1 | 3.756603000  | -4.754901000 | -0.370060000 |
| 1 | 1.475844000  | -5.597170000 | -0.761769000 |
| 1 | -0.093833000 | -1.609457000 | -0.537225000 |
| 1 | 6.527973000  | 2.469257000  | -0.823534000 |
| 1 | 8.293676000  | 4.157559000  | -0.523774000 |
| 1 | 10.237300000 | 3.688298000  | 0.950925000  |
| 1 | 10.377728000 | 1.508579000  | 2.134652000  |
| 1 | 8.596756000  | -0.168286000 | 1.861860000  |
| 1 | -0.169264000 | -5.610655000 | -2.446090000 |
| 1 | -2.422146000 | -6.476074000 | -2.926553000 |
| 1 | -4.402068000 | -5.529926000 | -1.761451000 |
| 1 | -4.089300000 | -3.714860000 | -0.094336000 |
| 1 | -1.833263000 | -2.870266000 | 0.411514000  |

##### 5. Coordinates of the optimized structure of DDPPFPh-

|    |             |             |              |
|----|-------------|-------------|--------------|
| 6  | 5.689994000 | 4.949457000 | -2.522367000 |
| 6  | 4.845873000 | 5.213955000 | -3.597037000 |
| 6  | 3.471700000 | 5.042246000 | -3.443174000 |
| 6  | 2.947553000 | 4.650913000 | -2.213733000 |
| 6  | 3.788064000 | 4.388784000 | -1.117044000 |
| 6  | 5.171677000 | 4.521335000 | -1.301673000 |
| 16 | 1.180720000 | 4.534265000 | -1.982862000 |
| 7  | 3.221448000 | 3.983041000 | 0.116815000  |
| 6  | 1.173639000 | 3.124001000 | -0.887669000 |
| 6  | 2.186875000 | 3.027030000 | 0.085785000  |
| 6  | 0.148849000 | 2.190469000 | -0.951952000 |
| 6  | 0.078895000 | 1.119361000 | -0.043920000 |

|   |               |              |              |
|---|---------------|--------------|--------------|
| 6 | 1.074433000   | 1.040880000  | 0.940576000  |
| 6 | 2.111685000   | 1.963640000  | 0.997806000  |
| 6 | -1.067275000  | 0.207509000  | -0.101927000 |
| 6 | -1.149584000  | -1.130914000 | 0.088829000  |
| 6 | -2.444969000  | -1.853718000 | 0.152110000  |
| 6 | -2.200317000  | -3.229968000 | 0.349293000  |
| 6 | -0.753773000  | -3.435492000 | 0.385504000  |
| 6 | -0.109481000  | -2.182190000 | 0.225337000  |
| 6 | -3.749066000  | -1.378119000 | 0.074492000  |
| 6 | -4.832893000  | -2.266210000 | 0.183719000  |
| 6 | -4.566788000  | -3.636004000 | 0.378624000  |
| 6 | -3.265101000  | -4.121449000 | 0.462224000  |
| 6 | -0.005201000  | -4.603479000 | 0.504864000  |
| 6 | 1.382881000   | -4.531963000 | 0.445492000  |
| 6 | 2.045837000   | -3.305606000 | 0.253458000  |
| 6 | 1.280026000   | -2.131834000 | 0.142709000  |
| 6 | 3.525479000   | -3.250883000 | 0.169261000  |
| 6 | -6.228374000  | -1.770970000 | 0.106618000  |
| 6 | -6.593341000  | -0.526677000 | 0.645495000  |
| 6 | -7.901290000  | -0.064143000 | 0.589222000  |
| 6 | -8.903691000  | -0.826743000 | -0.027519000 |
| 6 | -8.549017000  | -2.066304000 | -0.579568000 |
| 6 | -7.241563000  | -2.527484000 | -0.504100000 |
| 6 | 4.332896000   | -4.094891000 | 0.948904000  |
| 6 | 5.718688000   | -4.043208000 | 0.880614000  |
| 6 | 6.358961000   | -3.149016000 | 0.010500000  |
| 6 | 5.563120000   | -2.306254000 | -0.778928000 |
| 6 | 4.178124000   | -2.354077000 | -0.691951000 |
| 7 | -10.240092000 | -0.358677000 | -0.090232000 |
| 6 | -10.504095000 | 1.015934000  | -0.343102000 |
| 6 | -11.321961000 | -1.259313000 | 0.114148000  |
| 7 | 7.773568000   | -3.099950000 | -0.069375000 |

|   |               |              |              |
|---|---------------|--------------|--------------|
| 6 | 8.530911000   | -4.303736000 | -0.027196000 |
| 6 | 8.441095000   | -1.849978000 | -0.186353000 |
| 6 | -12.456469000 | -1.205536000 | -0.707596000 |
| 6 | -13.517143000 | -2.082322000 | -0.499617000 |
| 6 | -13.460074000 | -3.035827000 | 0.516567000  |
| 6 | -12.329873000 | -3.096457000 | 1.331387000  |
| 6 | -11.271972000 | -2.212418000 | 1.141049000  |
| 6 | -9.792723000  | 1.707542000  | -1.333684000 |
| 6 | -10.049450000 | 3.054317000  | -1.572796000 |
| 6 | -11.028077000 | 3.730064000  | -0.844296000 |
| 6 | -11.743719000 | 3.042731000  | 0.135588000  |
| 6 | -11.481551000 | 1.700228000  | 0.392850000  |
| 6 | 8.128574000   | -5.424389000 | -0.767089000 |
| 6 | 8.866875000   | -6.603042000 | -0.715098000 |
| 6 | 10.024998000  | -6.680418000 | 0.058026000  |
| 6 | 10.433414000  | -5.564164000 | 0.787453000  |
| 6 | 9.691537000   | -4.387029000 | 0.754507000  |
| 6 | 8.036465000   | -0.749702000 | 0.582921000  |
| 6 | 8.690753000   | 0.472535000  | 0.460392000  |
| 6 | 9.767383000   | 0.616414000  | -0.414375000 |
| 6 | 10.178395000  | -0.478481000 | -1.174022000 |
| 6 | 9.518958000   | -1.699626000 | -1.070405000 |
| 6 | 3.975522000   | 4.187933000  | 1.363062000  |
| 6 | 3.107281000   | 4.714666000  | 2.516731000  |
| 6 | 2.450601000   | 6.081108000  | 2.259805000  |
| 6 | 3.408692000   | 7.271545000  | 2.085913000  |
| 6 | 4.247738000   | 7.609395000  | 3.325067000  |
| 6 | 5.112338000   | 8.859972000  | 3.137909000  |
| 1 | 6.762960000   | 5.056197000  | -2.632481000 |
| 1 | 5.248511000   | 5.537819000  | -4.549176000 |
| 1 | 2.799063000   | 5.224523000  | -4.273302000 |
| 1 | 5.851787000   | 4.283218000  | -0.494824000 |

|   |               |              |              |
|---|---------------|--------------|--------------|
| 1 | -0.614007000  | 2.295750000  | -1.715503000 |
| 1 | 1.030385000   | 0.258453000  | 1.687544000  |
| 1 | 2.861956000   | 1.856696000  | 1.769278000  |
| 1 | -2.005878000  | 0.707281000  | -0.332493000 |
| 1 | -3.942655000  | -0.324487000 | -0.090944000 |
| 1 | -5.395513000  | -4.324805000 | 0.493268000  |
| 1 | -3.092346000  | -5.179712000 | 0.624293000  |
| 1 | -0.492486000  | -5.565101000 | 0.622230000  |
| 1 | 1.962646000   | -5.444975000 | 0.513414000  |
| 1 | 1.787155000   | -1.187542000 | 0.007329000  |
| 1 | -5.850245000  | 0.076061000  | 1.155050000  |
| 1 | -8.153160000  | 0.889724000  | 1.036096000  |
| 1 | -9.301677000  | -2.665117000 | -1.077502000 |
| 1 | -6.997573000  | -3.478974000 | -0.962539000 |
| 1 | 3.871374000   | -4.779685000 | 1.651194000  |
| 1 | 6.312596000   | -4.692516000 | 1.512079000  |
| 1 | 6.034115000   | -1.619299000 | -1.471171000 |
| 1 | 3.593720000   | -1.706818000 | -1.335743000 |
| 1 | -12.502074000 | -0.475758000 | -1.506735000 |
| 1 | -14.386604000 | -2.027200000 | -1.145230000 |
| 1 | -14.284856000 | -3.721442000 | 0.671619000  |
| 1 | -12.274703000 | -3.826965000 | 2.130863000  |
| 1 | -10.403644000 | -2.256229000 | 1.787093000  |
| 1 | -9.040475000  | 1.186438000  | -1.913377000 |
| 1 | -9.489881000  | 3.573127000  | -2.343220000 |
| 1 | -11.230179000 | 4.777017000  | -1.037631000 |
| 1 | -12.502968000 | 3.556174000  | 0.715029000  |
| 1 | -12.032978000 | 1.176816000  | 1.164451000  |
| 1 | 7.237377000   | -5.366926000 | -1.380150000 |
| 1 | 8.541160000   | -7.460161000 | -1.293927000 |
| 1 | 10.601312000  | -7.597553000 | 0.091367000  |
| 1 | 11.328294000  | -5.611584000 | 1.398014000  |

|   |              |              |              |
|---|--------------|--------------|--------------|
| 1 | 10.008069000 | -3.528233000 | 1.333823000  |
| 1 | 7.210012000  | -0.857355000 | 1.274712000  |
| 1 | 8.365094000  | 1.312255000  | 1.064314000  |
| 1 | 10.279195000 | 1.567569000  | -0.502322000 |
| 1 | 11.009892000 | -0.380529000 | -1.863094000 |
| 1 | 9.836514000  | -2.541755000 | -1.673121000 |
| 1 | 4.495817000  | 3.271875000  | 1.669656000  |
| 1 | 4.749175000  | 4.921551000  | 1.146452000  |
| 1 | 2.324705000  | 3.989536000  | 2.753951000  |
| 1 | 3.750368000  | 4.760832000  | 3.401890000  |
| 1 | 1.816881000  | 6.004828000  | 1.370595000  |
| 1 | 1.776037000  | 6.295006000  | 3.097201000  |
| 1 | 4.075753000  | 7.100013000  | 1.232181000  |
| 1 | 2.811111000  | 8.151296000  | 1.818427000  |
| 1 | 3.577810000  | 7.753343000  | 4.181886000  |
| 1 | 4.893781000  | 6.763012000  | 3.583363000  |
| 1 | 5.810904000  | 8.736211000  | 2.304172000  |
| 1 | 4.494765000  | 9.737801000  | 2.923065000  |
| 1 | 5.699928000  | 9.077588000  | 4.034199000  |

#### 6. Coordinates of the optimized structure of DNFPh-

|    |              |             |              |
|----|--------------|-------------|--------------|
| 6  | -5.605067000 | 5.099398000 | -2.024948000 |
| 6  | -4.683199000 | 5.678666000 | -2.888711000 |
| 6  | -3.324564000 | 5.492968000 | -2.644665000 |
| 6  | -2.894460000 | 4.756126000 | -1.544042000 |
| 6  | -3.814611000 | 4.129916000 | -0.680569000 |
| 6  | -5.179702000 | 4.325312000 | -0.947247000 |
| 16 | -1.156140000 | 4.743233000 | -1.159299000 |
| 7  | -3.379554000 | 3.349331000 | 0.416611000  |



|   |              |              |              |
|---|--------------|--------------|--------------|
| 6 | -4.347603000 | 3.026132000  | 1.477674000  |
| 6 | -5.246404000 | 1.796153000  | 1.251316000  |
| 6 | -6.197121000 | 1.575566000  | 2.433952000  |
| 6 | -7.127400000 | 0.371363000  | 2.248819000  |
| 6 | -8.082984000 | 0.151649000  | 3.427197000  |
| 6 | -9.012751000 | -1.049988000 | 3.234866000  |
| 6 | -1.056203000 | 3.154823000  | -0.360928000 |
| 6 | -2.144152000 | 2.680942000  | 0.404444000  |
| 6 | 0.151080000  | 2.473430000  | -0.394669000 |
| 6 | 0.362207000  | 1.299174000  | 0.350163000  |
| 6 | -0.693745000 | 0.867672000  | 1.162804000  |
| 6 | -1.913942000 | 1.530729000  | 1.181179000  |
| 6 | 1.683062000  | 0.672630000  | 0.328700000  |
| 6 | 2.062952000  | -0.626972000 | 0.403075000  |
| 6 | 3.483540000  | -1.034152000 | 0.537750000  |
| 6 | 3.562261000  | -2.442866000 | 0.586659000  |
| 6 | 2.209342000  | -2.978744000 | 0.439500000  |
| 6 | 1.298913000  | -1.897071000 | 0.330420000  |
| 6 | 4.637292000  | -0.265161000 | 0.655134000  |
| 6 | 5.883687000  | -0.890621000 | 0.813164000  |
| 6 | 5.942267000  | -2.295008000 | 0.861722000  |
| 6 | 4.792723000  | -3.074010000 | 0.749767000  |
| 6 | 1.761591000  | -4.294904000 | 0.359378000  |
| 6 | 0.408774000  | -4.541248000 | 0.145092000  |
| 6 | -0.507350000 | -3.485387000 | -0.003229000 |
| 6 | -0.050032000 | -2.162534000 | 0.092566000  |
| 6 | -1.960222000 | -3.756318000 | -0.203363000 |
| 6 | 7.127193000  | -0.087363000 | 0.992933000  |
| 6 | 7.567116000  | 0.868797000  | 0.015609000  |
| 6 | 8.747328000  | 1.640157000  | 0.281930000  |
| 6 | 9.465131000  | 1.429623000  | 1.487697000  |
| 6 | 9.043314000  | 0.488184000  | 2.392541000  |

|   |              |              |              |
|---|--------------|--------------|--------------|
| 6 | 7.876181000  | -0.265180000 | 2.141854000  |
| 6 | -2.446036000 | -4.526270000 | -1.314151000 |
| 6 | -3.853322000 | -4.787486000 | -1.414866000 |
| 6 | -4.735257000 | -4.265671000 | -0.433321000 |
| 6 | -4.251544000 | -3.507859000 | 0.603372000  |
| 6 | -2.866511000 | -3.257848000 | 0.714509000  |
| 6 | 6.907915000  | 1.065842000  | -1.229254000 |
| 6 | 7.364034000  | 1.989941000  | -2.139643000 |
| 6 | 8.509099000  | 2.769797000  | -1.859290000 |
| 6 | 9.185147000  | 2.592042000  | -0.677401000 |
| 6 | -1.600244000 | -5.017851000 | -2.346606000 |
| 6 | -2.106093000 | -5.750129000 | -3.394720000 |
| 6 | -3.489207000 | -6.030784000 | -3.473611000 |
| 6 | -4.340317000 | -5.554126000 | -2.507177000 |
| 1 | -6.668187000 | 5.231824000  | -2.188709000 |
| 1 | -5.008734000 | 6.268145000  | -3.737081000 |
| 1 | -2.584722000 | 5.943051000  | -3.296757000 |
| 1 | -5.928515000 | 3.875418000  | -0.313534000 |
| 1 | -3.780947000 | 2.901309000  | 2.403083000  |
| 1 | -4.968686000 | 3.912333000  | 1.624605000  |
| 1 | -5.826725000 | 1.916488000  | 0.332467000  |
| 1 | -4.634117000 | 0.902932000  | 1.100554000  |
| 1 | -5.611142000 | 1.442262000  | 3.352331000  |
| 1 | -6.802044000 | 2.478490000  | 2.586580000  |
| 1 | -7.712259000 | 0.504188000  | 1.329766000  |
| 1 | -6.524618000 | -0.533468000 | 2.098626000  |
| 1 | -7.498426000 | 0.017828000  | 4.345438000  |
| 1 | -8.683156000 | 1.057193000  | 3.576985000  |
| 1 | -9.681696000 | -1.177726000 | 4.090356000  |
| 1 | -9.633894000 | -0.929364000 | 2.341734000  |
| 1 | -8.441950000 | -1.976659000 | 3.118087000  |
| 1 | 0.957952000  | 2.871249000  | -1.000589000 |

|   |              |              |              |
|---|--------------|--------------|--------------|
| 1 | -0.559218000 | 0.012111000  | 1.811782000  |
| 1 | -2.689965000 | 1.143867000  | 1.823666000  |
| 1 | 2.496596000  | 1.390195000  | 0.243652000  |
| 1 | 4.587000000  | 0.817730000  | 0.648182000  |
| 1 | 6.905877000  | -2.776929000 | 0.980871000  |
| 1 | 4.865446000  | -4.155285000 | 0.788885000  |
| 1 | 2.454425000  | -5.123546000 | 0.455592000  |
| 1 | 0.052429000  | -5.563716000 | 0.097539000  |
| 1 | -0.759034000 | -1.357561000 | -0.040887000 |
| 1 | 10.353981000 | 2.021781000  | 1.677730000  |
| 1 | 9.594642000  | 0.325318000  | 3.311681000  |
| 1 | 7.542844000  | -0.983923000 | 2.881877000  |
| 1 | -5.796580000 | -4.472627000 | -0.520143000 |
| 1 | -4.926309000 | -3.108711000 | 1.352202000  |
| 1 | -2.499764000 | -2.683046000 | 1.557342000  |
| 1 | 6.038025000  | 0.467102000  | -1.465596000 |
| 1 | 6.845695000  | 2.117867000  | -3.083282000 |
| 1 | 8.855896000  | 3.498292000  | -2.583390000 |
| 1 | 10.074168000 | 3.174732000  | -0.459899000 |
| 1 | -0.540833000 | -4.800758000 | -2.308343000 |
| 1 | -1.440616000 | -6.110284000 | -4.171190000 |
| 1 | -3.874804000 | -6.612832000 | -4.302957000 |
| 1 | -5.405559000 | -5.751224000 | -2.567009000 |

## References

- 1 D. K. Dubey, G. Krucaite, S. S. Swayamprabha, R. A. K. Yadav, D. Blazelevicius, J. Tagare, S. Chavhan, T.-C. Hsueh, S. Vaidyanathan, S. Grigalevicius and J.-H. Jou, *Org. Electron.*, 2020, **79**, 105633.
- 2 S. S. Swayamprabha, G. Krucaite, D. K. Dubey, K. K. Kesavan, J. De, M. R. Nagar, H. Lee, S. Sutkuvienė, S. Pal, S.-Z. Chen, R. Beresnevičiūtė, S. Grigalevičius and J.-H. Jou, *Opt. Mater. (Amst)*., 2021, **120**, 111410.
- 3 K. Kumar, K. K. Kesavan, D. Thakur, S. Banik, J. Jayakumar, C.-H. Cheng, J.-H. Jou and S. Ghosh, *ACS Omega*, 2021, **6**, 10515–10526.
- 4 M. Kumar and L. Pereira, *Nanomater.* , 2020, 10.
- 5 J.-H. Jou, S.-H. Peng, C.-I. Chiang, Y.-L. Chen, Y.-X. Lin, Y.-C. Jou, C.-H. Chen, C.-J. Li, W.-B. Wang, S.-M. Shen, S.-Z. Chen, M.-K. Wei, Y.-S. Sun, H.-W. Hung, M.-C. Liu, Y.-P. Lin, J.-Y. Li and C.-W. Wang, *J. Mater. Chem. C*, 2013, **1**, 1680–1686.
- 6 Y. Liu, L. Hua, Z. Zhao, S. Ying, Z. Ren and S. Yan, *Adv. Sci.*, 2021, **8**, 2101326.
- 7 R. Furue, T. Nishimoto, I. S. Park, J. Lee and T. Yasuda, *Angew. Chemie Int. Ed.*, 2016, **55**, 7171–7175.
- 8 Y.-H. Kim, C. Wolf, H. Cho, S.-H. Jeong and T.-W. Lee, *Adv. Mater.*, 2016, **28**, 734–741.
- 9 Y. Liu, G. Xie, K. Wu, Z. Luo, T. Zhou, X. Zeng, J. Yu, S. Gong and C. Yang, *J. Mater. Chem. C*, 2016, **4**, 4402–4407.
- 10 T. Zhou, G. Xie, S. Gong, M. Huang, J. Luo and C. Yang, *ACS Appl. Mater. Interfaces*, 2017, **9**, 34139–34145.
- 11 Y. Wada, K. Shizu, S. Kubo, K. Suzuki, H. Tanaka, C. Adachi and H. Kaji, *Appl. Phys. Lett.*, 2015, **107**, 183303.
- 12 Y. Liu, X. Wei, Z. Li, J. Liu, R. Wang, X. Hu, P. Wang, Y. Yamada-Takamura, T. Qi and Y. Wang, *ACS Appl. Energy Mater.*, 2018, **1**, 543–551.
